# Supplementary material
Source: PubMed Central journal article supplement (PMC10183370)
Supplement: mmc3.pdf [file mmc3.pdf]

---

# *POLR1A* variants underlie phenotypic heterogeneity in craniofacial, neural, and cardiac anomalies

## Authors

Kelly Smallwood, Kristin E.N. Watt, Satoru Ide, ...,  
Rolf W. Stottmann, Paul A. Trainor,  
K. Nicole Weaver

## Correspondence

[kathryn.weaver@cchmc.org](mailto:kathryn.weaver@cchmc.org)

**Smallwood et al. describe a series of individuals with heterozygous variants in *POLR1A* in association with variable craniofacial, heart, and brain anomalies. Adverse effects of *POLR1A* perturbation are demonstrated on mouse development *in vivo*, as well as on rRNA transcription *in vitro*.**

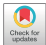

Smallwood et al., 2023, The American Journal of Human Genetics 110, 809–825

May 4, 2023 © 2023 American Society of Human Genetics.  
<https://doi.org/10.1016/j.ajhg.2023.03.014>

# POLR1A variants underlie phenotypic heterogeneity in craniofacial, neural, and cardiac anomalies

Kelly Smallwood,<sup>1</sup> Kristin E.N. Watt,<sup>2</sup> Satoru Ide,<sup>3,4</sup> Kristina Baltrunaite,<sup>1</sup> Chad Brunswick,<sup>1</sup> Katherine Inskeep,<sup>5,6</sup> Corrine Capannari,<sup>1</sup> Margaret P. Adam,<sup>7</sup> Amber Begtrup,<sup>8</sup> Debora R. Bertola,<sup>9</sup> Laurie Demmer,<sup>10</sup> Erin Demo,<sup>11</sup> Orrin Devinsky,<sup>12</sup> Emily R. Gallagher,<sup>7</sup> Maria J. Guillen Sacoto,<sup>8</sup> Robert Jech,<sup>13</sup> Boris Keren,<sup>14</sup> Jennifer Kussmann,<sup>15</sup> Roger Ladda,<sup>16</sup> Lisa A. Lansdon,<sup>17,18,19</sup> Sebastian Lunke,<sup>20,21,22</sup> Anne Mardy,<sup>23</sup> Kirsty McWalters,<sup>8</sup> Richard Person,<sup>8</sup> Laura Raiti,<sup>20</sup> Noriko Saitoh,<sup>24</sup> Carol J. Saunders,<sup>17,18,19</sup> Rhonda Schnur,<sup>8</sup> Matej Skorvanek,<sup>25,26</sup> Susan L. Sell,<sup>16</sup> Anne Slavotinek,<sup>27</sup> Bonnie R. Sullivan,<sup>15</sup> Zornitza Stark,<sup>20,21,22</sup> Joseph D. Symonds,<sup>28</sup> Tara Wenger,<sup>7</sup> Sacha Weber,<sup>29</sup> Sandra Whalen,<sup>14</sup> Susan M. White,<sup>20,21</sup> Juliane Winkelmann,<sup>30,31,32,33</sup> Michael Zech,<sup>30,31</sup> Shimriet Zeidler,<sup>34</sup> Kazuhiro Maeshima,<sup>3,4</sup> Rolf W. Stottmann,<sup>5,35</sup> Paul A. Trainor,<sup>2,36</sup> and K. Nicole Weaver<sup>1,37,\*</sup>

## Summary

Heterozygous pathogenic variants in *POLR1A*, which encodes the largest subunit of RNA Polymerase I, were previously identified as the cause of acrofacial dysostosis, Cincinnati-type. The predominant phenotypes observed in the cohort of 3 individuals were craniofacial anomalies reminiscent of Treacher Collins syndrome. We subsequently identified 17 additional individuals with 12 unique heterozygous variants in *POLR1A* and observed numerous additional phenotypes including neurodevelopmental abnormalities and structural cardiac defects, in combination with highly prevalent craniofacial anomalies and variable limb defects. To understand the pathogenesis of this pleiotropy, we modeled an allelic series of *POLR1A* variants *in vitro* and *in vivo*. *In vitro* assessments demonstrate variable effects of individual pathogenic variants on ribosomal RNA synthesis and nucleolar morphology, which supports the possibility of variant-specific phenotypic effects in affected individuals. To further explore variant-specific effects *in vivo*, we used CRISPR-Cas9 gene editing to recapitulate two human variants in mice. Additionally, spatiotemporal requirements for *Polr1a* in developmental lineages contributing to congenital anomalies in affected individuals were examined via conditional mutagenesis in neural crest cells (face and heart), the second heart field (cardiac outflow tract and right ventricle), and forebrain precursors in mice. Consistent with its ubiquitous role in the essential function of ribosome biogenesis, we observed that loss of *Polr1a* in any of these lineages causes cell-autonomous apoptosis resulting in embryonic malformations. Altogether, our work greatly expands the phenotype of human *POLR1A*-related disorders and demonstrates variant-specific effects that provide insights into the underlying pathogenesis of ribosomopathies.

## Introduction

Ribosomopathies are a phenotypically and genetically heterogeneous group of congenital malformation syndromes

caused by disruption of ribosome biogenesis. Ribosome biogenesis is a multi-step process that begins with transcription of ribosomal DNA genes by RNA polymerase I (Pol I).<sup>1</sup> Pathogenic variants in *TCOF1*, a transcription

<sup>1</sup>Division of Human Genetics, Cincinnati Children's Hospital Medical Center, Cincinnati, OH, USA; <sup>2</sup>Stowers Institute for Medical Research, Kansas City, MO, USA; <sup>3</sup>Genome Dynamics Laboratory, National Institute of Genetics, Mishima, Shizuoka, Japan; <sup>4</sup>Department of Genetics, School of Life Science, Sokenkai (Graduate University for Advanced Studies), Mishima, Shizuoka, Japan; <sup>5</sup>Steve and Cindy Rasmussen Institute for Genomic Medicine, Nationwide Children's Hospital, Columbus, OH, USA; <sup>6</sup>Division of Developmental Biology, Cincinnati Children's Hospital Medical Center, Cincinnati, OH, USA; <sup>7</sup>Department of Pediatrics, University of Washington, Seattle, WA, USA; <sup>8</sup>GeneDx, LLC, Gaithersburg, MD, USA; <sup>9</sup>University of São Paulo, São Paulo, Brazil; <sup>10</sup>Atrium Health's Levine Children's Hospital, Charlotte, NC, USA; <sup>11</sup>Sibley Heart Center, Atlanta, GA, USA; <sup>12</sup>Department of Neurology, Comprehensive Epilepsy Center, New York University Grossman School of Medicine, New York, NY, USA; <sup>13</sup>Department of Neurology, Charles University, 1st Faculty of Medicine and General University Hospital in Prague, Prague, Czech Republic; <sup>14</sup>Genetic Department, APHP, Sorbonne Université, Pitié-Salpêtrière Hospital, 47-83 Boulevard de l'Hôpital, 75013 Paris, France; <sup>15</sup>Division of Clinical Genetics, Department of Pediatrics, Children's Mercy Kansas City, 2401 Gillham Road, Kansas City, MO, USA; <sup>16</sup>Department of Pediatrics, Penn State Health Children's Hospital, Hershey, PA, USA; <sup>17</sup>Department of Pathology and Laboratory Medicine, Children's Mercy Kansas City, 2401 Gillham Road, Kansas City, MO, USA; <sup>18</sup>Genomic Medicine Center, Children's Mercy Research Institute, 2401 Gillham Road, Kansas City, MO, USA; <sup>19</sup>School of Medicine, University of Missouri-Kansas City, 2411 Holmes Street, Kansas City, MO, USA; <sup>20</sup>Victorian Clinical Genetics Services, Murdoch Children's Research Institute, Flemington Road, Melbourne, VIC, Australia; <sup>21</sup>University of Melbourne, Melbourne, VIC, Australia; <sup>22</sup>Australian Genomics, Melbourne, VIC, Australia; <sup>23</sup>Department of Women's Health, University of Texas Austin Dell Medical Center, Austin, TX, USA; <sup>24</sup>The Cancer Institute of JFCR, Tokyo, Japan; <sup>25</sup>Department of Neurology, P.J. Safarik University, Kosice, Slovak Republic; <sup>26</sup>Department of Neurology, University Hospital of L. Pasteur, Kosice, Slovak Republic; <sup>27</sup>Division of Medical Genetics, Department of Pediatrics, University of California San Francisco, San Francisco, CA, USA; <sup>28</sup>Paediatric Neuroscience Research Group, Royal Hospital for Children, Glasgow G667AB, UK; <sup>29</sup>CCA-AHU de génétique clinique et de neurogénétique, Service de Génétique et de Neurologie, CHU de Caen, Caen, France; <sup>30</sup>Institute of Neurogenomics, Helmholtz Zentrum München, Munich, Germany; <sup>31</sup>Institute of Human Genetics, School of Medicine, Technical University of Munich, Munich, Germany; <sup>32</sup>Lehrstuhl für Neurogenetik, Technische Universität München, Munich, Germany; <sup>33</sup>Munich Cluster for Systems Neurology, SyNergy, Munich, Germany; <sup>34</sup>Department of Clinical Genetics, Erasmus MC, Rotterdam, the Netherlands; <sup>35</sup>Department of Pediatrics, The Ohio State University School of Medicine, Columbus, OH, USA; <sup>36</sup>Department of Anatomy and Cell Biology, University of Kansas Medical Center, Kansas City, KS, USA; <sup>37</sup>Department of Pediatrics, University of Cincinnati College of Medicine, Cincinnati, OH, USA

\*Correspondence: [kathryn.weaver@cchmc.org](mailto:kathryn.weaver@cchmc.org)

<https://doi.org/10.1016/j.ajhg.2023.03.014>

© 2023 American Society of Human Genetics.

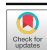

factor which binds rDNA promoters and Pol I, are associated with Treacher Collins syndrome (TCS [MIM: 154500]) which is characterized by a specific pattern of anomalous craniofacial development resulting in mandibulofacial dysostosis.<sup>2</sup> Pathogenic variants in genes encoding Pol I subunits POLR1A, POLR1B, POLR1C, and POLR1D have been associated with more heterogeneous human phenotypes. Pathogenic variants in *POLR1D* (MIM: 613715) are associated with dominant<sup>3</sup> or recessive<sup>4</sup> TCS while pathogenic variants in *POLR1C* (MIM: 610060) are associated with recessive TCS<sup>3</sup> or recessive leukodystrophy (MIM: 616494).<sup>5</sup> More recently, pathogenic variants in *POLR1B* (MIM: 602000) were associated with dominant TCS.<sup>6</sup> We previously showed that heterozygous pathogenic variants in *POLR1A* (MIM: 616404), which encodes the largest Pol I subunit, cause autosomal-dominant acrofacial dysostosis, Cincinnati-type (AFDCIN [MIM: 616462]), which is characterized by craniofacial anomalies reminiscent of TCS, as well as variable limb defects.<sup>7</sup>

*Tcof1* and genes encoding the Pol I subunits A, B, C, and D are broadly expressed during mouse embryogenesis<sup>8</sup> and yet their associated human phenotypes range from relatively restricted to the face (*TCOF1*, *POLR1B*, *POLR1D*) to variable craniofacial and limb involvement (*POLR1A*) and variable craniofacial and neurologic involvement (*POLR1C*). Of the genes encoding Pol I subunits A–D, *POLR1A* variants have been described in a relatively small group of individuals without recognized genotype-phenotype correlations and with broader phenotypic heterogeneity compared to individuals harboring variants in *POLR1B–D*. Since 2015 when 3 individuals with AFDCIN were reported, 4 additional individuals with *POLR1A*-related disease have been described. Shenoy et al.<sup>9</sup> reported a single individual (proband 7) with severe mandibulofacial dysostosis without limb defects and a *de novo* *POLR1A* c.1325G>A (p.Arg442His) variant. An additional individual with the same variant as individual 1A2 in Weaver et al.<sup>7</sup> was reported by da Rocha et al.<sup>10</sup> as part of a series of individuals with limb malformations (individual F12). Finally, a report of neurodegenerative disease in two brothers with homozygous *POLR1A* variants was published in 2017,<sup>11</sup> providing preliminary evidence that *POLR1A* variants may also lead to neurologic disease without craniofacial or limb involvement.

Here, we describe 17 previously unreported individuals with heterozygous novel (not previously reported in gnomAD) or ultra-rare variants in *POLR1A* and provide additional clinical details on 1 previously reported individual (F12 in da Rocha et al.).<sup>10</sup> While all have some degree of craniofacial dysmorphism, they also present with an increased incidence of cardiac and neurodevelopmental abnormalities, findings which were not appreciated in the small number of previously described individuals. Given that cardiac and neurodevelopmental abnormalities have been associated with other disorders of ribosome biogenesis,<sup>2,12,13</sup> we hypothesized that human phenotypes associated with heterozygous *POLR1A* variants

extend beyond the face and limbs, and that there may be genotype- and tissue-specific effects on development. While recent work identified a critical developmental requirement for *Polr1a* in pre-migratory neural crest cells,<sup>8</sup> variant-specific effects and the requirement for *Polr1a* in other developmental lineages have not been defined. We used a combination of *in vitro* (cell culture) and *in vivo* (in mice) modeling to investigate the effects of specific variants, further delineate the role of *Polr1a* in craniofacial development, and define the requirements for *Polr1a* in cardiac and neural development.

## Material and methods

### Identification and characterization of human cohort

The cohort was assembled through collaboration with GeneDx (Gaithersburg, Maryland), GeneMatcher,<sup>14</sup> and personal e-mail communication to the corresponding author (K.N.W.). Individuals were included if they had a heterozygous variant in *POLR1A* interpreted as being of uncertain significance, likely pathogenic, or pathogenic according to American College of Medical Genetics/Association for Molecular Pathology consensus criteria.<sup>15</sup> Existing clinical information about each individual was collected from the referring physician or healthcare provider. Individuals or their legal guardians agreed to participate, and consent for publication of photographs (if included) was obtained separately. The Institutional Review Board at Cincinnati Children's provided oversight of the study (IRB 2021-0535).

### *In vitro* assessment of *POLR1A* variant effects on rRNA transcription

To generate expression vectors for 8 of the 12 unique *POLR1A* variants, site-directed mutagenesis was performed to introduce each point mutation into pEF1-FRT-HaloTag-*POLR1A* (RPA194)<sup>16</sup> using primers containing the desired mutation and a PCR protocol that amplifies the entire plasmid template. A genome-edited HCT116 cell line expressing mAID-mClover-*POLR1A* (RPA194)<sup>16</sup> from the endogenous locus was transfected with each pEF1-FRT-HaloTag-*POLR1A* construct (wild-type and 8 variants). Following transfection, cells were incubated in medium supplemented with doxycycline (1 µg/mL) for 24 h at 37°C under 5% CO<sub>2</sub>, and then treated with 500 µM indole-3-acetic acid (19119-61, Nacalai), a natural auxin, in the presence of doxycycline for 3 h. As shown previously, this results in rapid knock-down of the cells' native *POLR1A*,<sup>16</sup> thus reducing the risk of indirect effects and allowing expression of only the transfected (mutant or wild-type) Halo-Tag-*POLR1A*. After the treatment, 5-ethynyl uridine (EU) incorporation was performed with Click-iT RNA Alexa Fluor 594 imaging kits (C10330, Thermo Fisher Scientific) according to the manufacturer's instructions. EU incorporation provides a readout of RNA transcription rate, but rRNA transcription specifically can be determined by restricting analysis to the nucleoli. Section images were recorded with a DeltaVision Elite microscope (Applied Precision). For quantitative analysis of rRNA transcription, the nucleolar region of interest was created based on HaloTag-*POLR1A* signals in Fiji software. To reduce the effect of variation in HaloTag-*POLR1A* expression level between cells, EU signal intensity was normalized to HaloTag-*POLR1A* signal intensity in a cell, and the relative ratio of each mutant to wild-type cells was calculated.

## Image analysis by the wndcharm machine learning algorithm and fisher linear discriminant analysis (FLDA)

For quantitative image analysis, we first excised nucleolar images by Fiji software<sup>17</sup> and subjected them to machine learning software, wndchrn v.1.60.<sup>18</sup> Wndchrn (weighted neighbor distances via a compound hierarchy of algorithms representing morphology) is a computational pattern recognition approach that provides a quantitative assessment of the differences between wild-type and mutant morphological phenotypes.<sup>18,19</sup> We created 10 image folders, each containing deconvolved nucleolar images from Halo-tagged *POLR1A* variant-expressing cells. Wild-type and 9 variants were studied: 8 described in the current work (corresponding to *POLR1A* p.Glu1330del, p.Cys1562Phe, p.Asp59Val, p.Val1631Met, p.Pro1638Leu, p.Met496Ile, p.Val1241Ile, p.Arg393His, and p.Glu593Gln) as well as the previously published *POLR1A* c.1777G>C (p.Glu593Gln), reported by Weaver et al.<sup>7</sup> in an individual with severe craniofacial and limb anomalies. The dataset was tested by 60 rounds of cross validations to measure class similarity which was visualized as a phylogenetic tree by the PHYLIP package.<sup>20</sup> The numbers of images used were 93 (wild-type), 113 (p.Glu1330del), 127 (p.Cys1562Phe), 94 (p.Asp59Val), 93 (p.Val1631Met), 72 (p.Pro1638Leu), 79 (p.Met496Ile), 108 (p.Val1241Ile), 67 (p.Arg393His), and 37 (p.Glu593Gln). The options used for image analysis were a large feature set of 2,919 (-l) and multi-processors (-m).

To visualize the relative image similarity individually in 3D scatter plotting, we used a machine learning library called scikit-learn in Python. All the images in each class were applied to wndchrn to compute the Fisher scores of all 2,919 image features implanted in wndchrn, and the top 438 were extracted. The 438 feature values for each image were then used to perform Fisher Linear Discriminant Analysis (FLDA). FLDA finds the vector that maximizes the separation between each variant of the image data and enables dimensionality reduction from 438 to 3 to describe 3D scatter plotting.

## Generation of *Polr1a* mouse alleles

The animal protocol for this work was approved by the Cincinnati Children's Hospital Medical Center Institutional Animal Care and Use Committee (IACUC #2019-0043) or the Stowers Institute for Medical Research (IACUC #2022-143). *Polr1a*<sup>tm1a(EUCOMM)Hmgu/BayMmucd</sup> (henceforth *Polr1a*<sup>tm1a/+</sup>) mice were created as previously described.<sup>8,21</sup> The *Tm1a* allele consists of an *FRT* sequence followed by the *LacZ* sequence and a *loxP* site, a neomycin cassette driven by the human beta-actin promoter, an SV40 polyA, a second *FRT* site, a second *loxP* site, and a third *loxP* site downstream of exon 6 (Figure S5A). These mice were bred with germline Flpase transgenic mice (B6.129S4-Gt (ROSA)26Sor-*tm1(FLP1)Dym/Rainf*) to generate mice with a conditional allele (*Polr1a*<sup>tm1c/+</sup> or *Polr1a*<sup>lox/+</sup>). *Polr1a*<sup>lox/+</sup> mice were bred with B6.C-Tg (CMV-cre)1Cgn/J mice to create mice with a germline deletion allele, *Polr1a*<sup>tm1d/+</sup>. *Polr1a* allele constructs are shown in Figure S5A. *Polr1a*<sup>tm1a</sup> and *Polr1a*<sup>tm1d</sup> are functionally both null alleles (*Polr1a*<sup>null</sup>).

A mouse model of *POLR1A* c.4685G>T (p.Cys1562Phe) was generated by the CCHMC Transgenic Animal and Genome Editing (TG) Core. This variant was chosen because it was identified as a *de novo* event in two unrelated individuals (15 and 16) with near-identical phenotypes (infantile spasms, hypotonia, and hypertelorism) (Figure 1A). The methods for design of sgRNAs and production of animals were previously described.<sup>22</sup> The sgRNA was selected using on- and off-target scores from CRISPOR<sup>23</sup> and transcribed *in vitro* using the MEGAshorscript T7 kit (ThermoFisher). The product was purified

with the MEGAclear Kit (ThermoFisher) and stored at -80°C. The injection mix was prepared by incubating sgRNA and Cas9 protein (IDT) at 37°C for 15 min to form ribonucleoproteins and then adding the single-stranded DNA donor oligo (IDT). The final concentrations were 50 ng/μL sgRNA, 100 ng/μL Cas9 protein, and 75 ng/μL donor oligo. The mutant mice were generated by injection of the mix into the cytoplasm of fertilized eggs of C57BL/6 genetic background, using a piezo-driven microinjection technique.<sup>24</sup> After injection, eggs were transferred into the oviductal ampulla of pseudopregnant CD-1 females. In addition to the desired c.4676G>T (p.Cys1559Phe) mutation, a silent mutation was also introduced (c.4680\_4683delinsTTTA) to enable genotyping with PCR followed by restriction enzyme digest with *DraI* (New England Biolabs). Three mosaic male mice were born, and all carried the desired *Polr1a* c.4676G>T (p.Cys1559Phe) variant that is orthologous to *POLR1A* c.4685G>T (p.Cys1562Phe). One mouse had only the c.4676G>T variant (line known as Cys1559Phe\_b), while two mice had the desired variant in *trans* with deletions on the other allele (lines known as Cys1559Phe\_a and Cys1559Phe\_c). The offspring of these mosaic founders were sequenced to confirm genotyping and selected for future mating if they had the G>T variant and no additional deletions. There were no observed phenotypic differences between the a/b/c lines, which will subsequently be referred to as *Polr1a*<sup>C1559F</sup>. sgRNA and donor sequences used for generation of this allele are shown in Table S1.

A mouse model of *POLR1A* c.4913C>T (p.Pro1638Leu) was generated using the same method as above, with the exception that the sgRNA was purchased from Synthego. This variant was chosen because it was identified in the individual who had the most severe congenital heart defect among the entire cohort (individual 18). Two mosaic male mice were produced. One had only the desired c.4904C>T (p.Pro1635Leu) variant, orthologous to *POLR1A* c.4913C>T (p.Pro1638Leu). The other had the desired variant as well as an additional substitution (c.4895C>T [p.Ala1632Val]) which was confirmed to be in *cis* with c.4904C>T. The offspring of both founders were sequenced to confirm genotyping before proceeding with any further mating. sgRNA and donor sequences used for generation of these alleles are shown in Table S1. The mice used for experiments are subsequently referred to as *Polr1a*<sup>P1635L</sup>.

## Mouse maintenance and genotyping

Mutant embryos were generated using breeding pairs as shown in Table S2. Noon on the day after mating (as judged by vaginal plug) was designated as embryonic day (E) 0.5, and somites were counted in young (E9.5 and earlier) embryos to ensure staging was consistent and accurate. *Polr1a* animals were genotyped using the primers listed in Table S3. The PCR product from *Polr1a*<sup>C1559F</sup> was digested by restriction enzyme *DraI* (New England Biolabs) to produce 173 bp and 140 bp products in mutants. The PCR product from *Polr1a*<sup>P1635L</sup> was digested by restriction enzyme *MboII* (New England Biolabs), producing 146 bp and 127 bp products.

For conditional deletion of *Polr1a* in specific cell lineages of interest, we used four different Cre recombinase-expressing alleles. *Wnt1Cre* (B6; Tg (Wnt1-cre)<sup>11Rth</sup>) was used to delete *Polr1a* in pre-migratory neural crest cells and was genotyped as previously described.<sup>25</sup> *Sox10Cre* (B6; CBA-Tg(*Sox10-cre*)1Wdr/J) was used to delete *Polr1a* in migratory neural crest cells and was genotyped as previously described.<sup>26</sup> *Mef2c-AHF-Cre* (Tg(*Mef2c-cre*)2Blk/Mmnc) was used to delete *Polr1a* in the anterior heart field and was genotyped as previously described.<sup>27</sup> *Foxg1-IRES-Cre* (B6.129T(SJL)-*Foxg1*<sup>tm1.1(cre)Ddmo/J</sup>) was used to delete *Polr1a* in

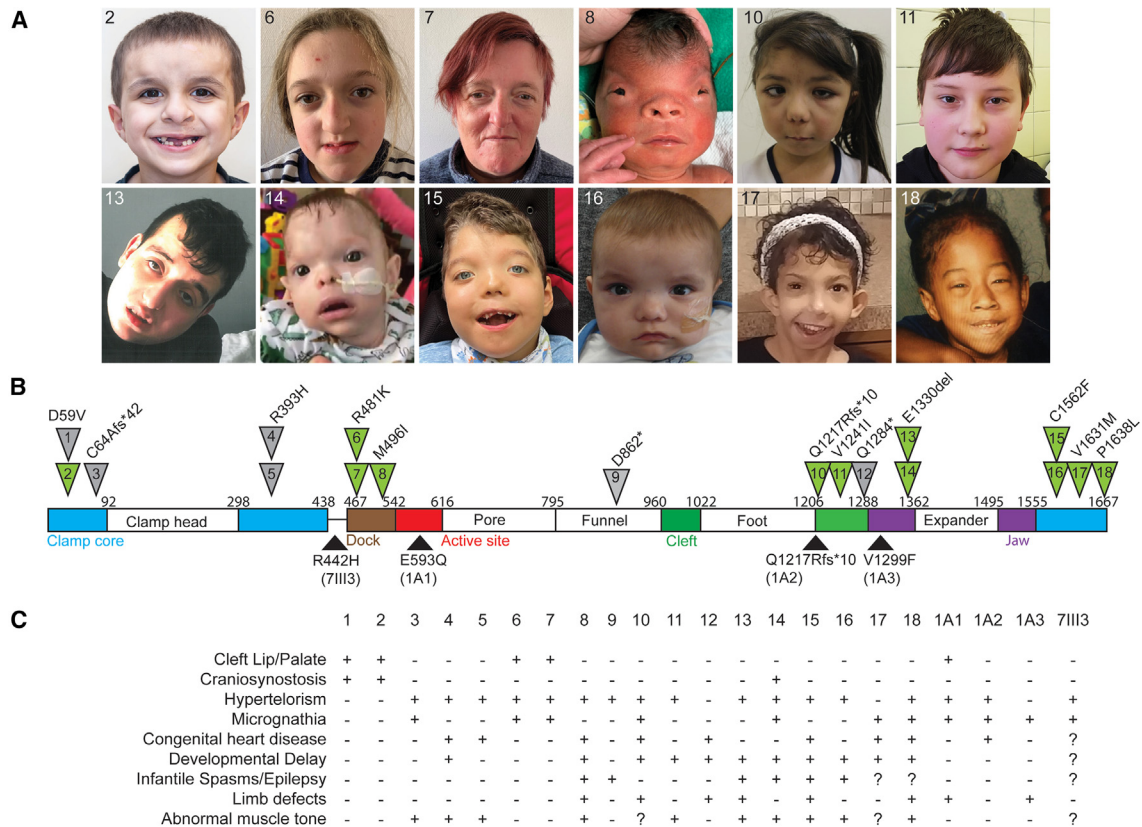

### Figure 1. Human cohort phenotypes

(A) Facial photographs of 12 individuals in the cohort.

(B) Diagram of POLR1A with all reported variant locations indicated. Variants of individuals with photos are indicated in green triangles. Variants reported in this work are above and previously published variants are below the protein diagram. Of previously published affected individuals, IA1, IA2, and IA3 were reported by Weaver et al.<sup>7</sup> and 7III3 was reported by Shenoy.<sup>9</sup> IA3 variant details are c.3895G>T (p.Val1299Phe). Details for all other variants are contained within the manuscript and supplemental documents.

(C) Phenotype summary of all individuals with heterozygous POLR1A variants.

the telencephalon and was genotyped as previously described.<sup>28</sup> For lineage tracing, we used a *ROSA<sup>dTom/EGFP</sup>* (B6.129(Cg)-*Gt(ROSA)26Sor<sup>tm4(ACTB-tTomato,-EGFP)<sup>Luc</sup>/+</sup>*) allele, which activates GFP in cells that express Cre recombinase and their lineage descendants.<sup>29</sup> For all mutant lines created, a chi-square test was used to compare observed and expected Mendelian genotypes for each cross.

### X-gal staining

*LacZ* transgene activity was visualized in whole embryos by fixing for 15 min at room temperature with 4% paraformaldehyde, washing with PBST three times (5 min each) at room temperature, washing in LacZ Wash Buffer (0.36% sodium phosphate monobasic, 1.094% sodium phosphate dibasic, 0.2% 1M MgCl<sub>2</sub>, 0.0001% deoxycholate, and 0.0002% nonidet-P40 in ddH<sub>2</sub>O), and staining overnight with X-gal (1 mg/mL). *LacZ* transgene activity was visualized in sectioned embryos by fixing for 2 h at room temperature with 4% paraformaldehyde, washing with PBST two times (5 min each) at room temperature, then dehydrating overnight at 4°C with 30% sucrose, and embedding in OCT freezing compound. Embedded embryos were sectioned at 12 μm, post-fixed in 0.5% paraformaldehyde on ice for 10 min, and then rinsed with cold PBS. Sections were then washed in LacZ Wash Buffer on ice for 10 min, stained with X-gal at room temperature, washed again with LacZ Wash Buffer two times (5 min each), and rinsed

with PBS for 5 min. Stained sections were sealed with Pro-Long Gold (Invitrogen). Whole embryos and sectioned embryos were viewed on a Zeiss Discovery V8 stereomicroscope and imaged on brightfield with an Axiocam 305 camera.

### Histology

Histological analysis was conducted on formalin- or Bouins-fixed tissues, paraffin-embedded, sectioned at 8–10 μm, and stained with hematoxylin and eosin. Histology sections were viewed on a Zeiss Discovery V8 stereomicroscope and imaged with an Axiocam 305 camera.

### Myocardial thickness quantification

Histology images were viewed and measured using Zeiss ZEN Blue software. The myocardial thickness for each sample was measured at three positions for each ventricle: the dorsal, lateral, and ventral surface. Seven sections of the ventricles were selected at random for the measurements.

### Skeletal preparations

Mouse embryo heads were collected at E17, deskinning, and fixed in 95% ethanol for 2 days, then placed in Alcian blue for cartilage staining overnight at room temperature. The skulls were then washed in 95% ethanol for 2 days and cleared in a 1% KOH

solution for 24 h at room temperature. Bone was counterstained with Alizarin Red for 24 h at room temperature. The skulls were then cleared with a 20% glycerol/1% KOH solution (at room temperature, changing daily), stored in 50% glycerol/50% ethanol solution, and photographed.

### Mouse echocardiography

Mouse echocardiography was performed by the CCHMC Cardiovascular Imaging Core Research Laboratory (CICRL). Mice were anesthetized using inhaled isoflurane, had their chest hair removed with a depilatory agent, and were secured with tape to a warmed imaging platform. Transthoracic echocardiograms were performed using a Vevo 3100 mouse echocardiography system equipped with a 40 MHz high-frequency transducer. Mice were returned to their cages and observed until they had completely recovered (3–5 min). The echocardiography data were downloaded to Vevo LAB analysis software. All measurements were performed in triplicate on three consecutive cardiac cycles and reported as an average value.

### Whole-mount immunohistochemistry

Embryos used for whole-mount immunohistochemistry (WMIHC) for Cleaved Caspase-3 (CC3) were fixed in 4% paraformaldehyde in PBS for 30 min, followed by a 1-min wash in PBS. Samples were then incubated in a WMIHC blocking solution (0.1% NGS, 0.01% sodium azide, 0.001% Triton X-100 in PBS) for 24 h, followed by incubation with primary antibody anti-Cleaved Caspase-3 (CC3 1:300, Cell Signaling Technology #9661, in WMIHC blocking solution) for 72 h, then four washes (1 h each) in PBS, and incubation with secondary antibody in the dark for 48 h. Secondary antibodies included Invitrogen Alexa Fluor 488, Invitrogen Alexa Fluor 555, and Invitrogen Alexa Fluor 594 (all goat anti-rabbit, applied at 1:500). The samples were then washed four times (30 min each) in PBS, incubated in DAPI for 24 h, washed in PBS for 30 min, then incubated in RIMS (88% Histodenz, 0.1% Tween 20, 0.01% sodium azide in 0.02M Phosphate Buffer) for 24 h. All washes and incubations were done on a rocker at room temperature. Images were taken on a Nikon C2+ confocal microscope.

Embryos used for WMIHC with PECAM-1 (platelet endothelial cell adhesion molecule; BD Biosciences) were fixed in 4% PFA overnight, dehydrated through a graded methanol/PBS series into 100% methanol, and stored at  $-20^{\circ}\text{C}$  until processed. Embryos were treated with Dent's bleach for 2 h, rehydrated through a graded methanol/PBS series into PBS, immunostained with a PECAM1 antibody (BD Pharmingen #553370 at 1:500), followed by an HRP-coupled secondary antibody (goat anti-rat HRP, 1:500). Color revelation was performed using the DAB substrate Kit (Vector laboratories, SK-4100) according to the manufacturer's instructions. The embryos were stained until the desired color intensity was obtained, and then rinsed three times with PBST. Bright-field images of embryos were taken on a Leica MZ16 microscope using a Nikon DS-Ri1 camera. Manual z-stacks were taken and assembled using Helicon Focus software.

### Section immunohistochemistry

Embryos used for section immunohistochemistry (E9.25–E12.25) were fixed overnight in 4% paraformaldehyde at  $4^{\circ}\text{C}$ , dehydrated in 30% sucrose at  $4^{\circ}\text{C}$ , cryo-embedded in OCT compound, and sectioned at a thickness of 10  $\mu\text{m}$ . Sections were collected on slides and placed in boiling citrate buffer (1M sodium citrate, 1M citric acid at pH 6.0) and allowed to cool on bench top for 40 min. Sec-

tions were then blocked in 4% Normal Goat Serum in PBST for 30 min and incubated overnight at  $4^{\circ}\text{C}$  with primary antibody in a humid chamber. Primary antibodies included anti-Cleaved Caspase-3 (1:300, Cell Signaling Technology #9661) and anti-phospho-Histone H3 (1:500, Sigma-Aldrich H0412). Slides were washed in PBS, and then secondary antibodies were added for 1 h at room temperature. Secondary antibodies included Invitrogen Alexa Fluor 488, Invitrogen Alexa Fluor 555, and Invitrogen Alexa Fluor 594 (goat anti-rabbit, applied at 1:500). Slides were then washed in PBS, incubated in DAPI for 15 min at room temperature, washed again with PBS, sealed with ProLong Gold (Invitrogen), and imaged on a Nikon C2+ confocal microscope.

Quantification of cells positive for CC3 or pHH3 immunostaining was performed with Nikon Elements software. Cells were counted using bright spot detection on respective channels. Positive cell numbers were compared to total cells counted (DAPI-stained cells) of the specific area. Regions of interest (ROI) were manually drawn when required and are noted in figures.

### Intravascular/intracardiac ink injection

E11.5 mutant *Polr1a*<sup>fl<sup>ox</sup>/fl<sup>ox</sup></sup>; *Wnt1-Cre* and their littermate controls were dissected free from the uterus with their yolk sacs intact in Tyrode's buffer solution at room temperature. Embryos were then incubated in pre-warmed DMEM/F12 media at  $37^{\circ}\text{C}$  and 20%  $\text{O}_2$ ; 5%  $\text{CO}_2$ ; 75%  $\text{N}_2$  in roller culture bottles (BTC engineering) for 30 min to ensure maintenance of a robust heartbeat. The embryos were then transferred in warm media to a petri dish and the vitellin vein of the yolk sac, which feeds through the umbilical cord into the sinus venosus of the heart, was injected with undiluted highlighter ink from a liquid Sharpie pen<sup>30</sup> using a mouth pipette and pulled glass needle. The embryos were then returned to roller culture for a few minutes to ensure the highlighter ink had circulated throughout the entirety of the embryo and yolk sac, before visualizing with a GFP filter on Leica stereoscope, followed by fixation with 4% PFA and overnight staining in DAPI. Embryos were imaged the next day on a Zeiss 700 upright confocal microscope and processed with Zeiss Zen Blue software.

### RNA sequencing and analysis

Telencephalons were dissected from E12.5 *Polr1a*<sup>C1559E/fl<sup>ox</sup></sup>; *Foxg1-Cre* and *Polr1a*<sup>null/fl<sup>ox</sup></sup>; *Foxg1-Cre* embryos as well as control littermates. Dissected tissue was flash-frozen using dry ice and stored at  $-80^{\circ}\text{C}$ . RNA was extracted from frozen tissue using Trizol and cleaned post-isolation through an ethanol and sodium acetate precipitation. RNA sequencing was performed by Novogene (Novogene, Davis Lab). The RNA-seq analysis was modeled after the DIYtranscriptomics pipeline. Raw reads were checked for quality control through FastQC. Raw reads were pseudoaligned to the reference mouse transcriptome (Ensembl v.39) in the Ubuntu operating system using Kallisto. Kallisto outputs were imported using tximport, and subsequent analysis was carried out in the statistical computing environment R. Various R packages were used throughout the analysis; notably tidyverse, edgeR, limma, and gprofiler2. Genes expressed less than 1 count per million (CPM) in two or more samples were removed, and the remaining genes were normalized using Trimmed Mean of M-values (TMM). To identify differentially expressed genes, precision weights were first applied to each gene using voom, then data were normalized using the TMM method. Linear modeling and Bayesian stats were used to find genes that were up- or down-regulated by 2-fold or more, with a false-discovery rate (FDR) less than or equal to 0.1. Genes

were divided into four modules, based on genotype and up- or down-regulation. Gene ontology (GO) analysis was carried out through the gprofiler2 package for each module.

### Statistical analysis

Statistical analysis and data plotting were carried out in the statistical computing environment R. Outliers ( $>1.5 \times \text{IQR}$ ) were identified and removed. Unless otherwise stated, statistical significance was determined with t tests: Student's t test when groups had equal variances and Welch's t test when groups had unequal variances. When the cause of unequal variance is known (e.g., litter effect), it is stated in the figure legend.

## Results

### Phenotypes of individuals with *POLR1A* variants

Clinical or research exome or genome sequencing identified 13 heterozygous rare or novel (previously unreported in gnomAD) variants in *POLR1A* (GenBank: NM\_015425.6) in 18 individuals. This included one sibling pair (individuals 1 and 2 are brothers), two mother/child duos (individuals 4 and 5 and individuals 6 and 7), four individuals with two recurrent *de novo* variants (individuals 13 and 14 share a variant, as do individuals 15 and 16), and eight additional unique variants each found in one individual. Available facial photographs, location of each variant, and a summary of clinical phenotypes are shown in Figures 1A–1C. Additional, detailed clinical information about each individual can be found in the supplemental information and Table S5. Nine variants were missense and four were nonsense or frameshift. Seven variants were confirmed to be *de novo*, three were maternally inherited, four were paternally inherited, and four were of undetermined inheritance. The most common phenotypes present in these individuals were craniofacial anomalies (18/18 with anomalies ranging from isolated hypertelorism to clefting and/or cranial bone abnormalities as described in Figure 1C and Table S5) and abnormal neurodevelopment (14/18 with developmental delay, epilepsy, and/or abnormal muscle tone). One individual had cervico-thoracic syringomyelia and ventriculomegaly (individual 6, Figure S1A) and one individual had almost complete acalvaria (individual 8, Figures S1B and S1C). Overall, 6/18 (33%) had epilepsy, 11/18 (61%) had developmental delay, 8/18 (44%) had a congenital heart defect, and 6/18 (33%) had a limb defect. The most severe congenital heart defect was identified in individual 18 (bicuspid aortic valve, aortic and pulmonary artery aneurysm requiring surgical repair, partial atrioventricular canal, and cleft mitral valve). She also had significant craniofacial malformation as well as developmental delay.

There were two recurrent variants identified in our cohort. *POLR1A* c.4685G>T (p.Cys1562Phe) was identified as a *de novo* variant in two unrelated individuals with hypertelorism, infantile spasms, and hypotonia. Both progressed to multi-drug resistant epilepsy and have severe global developmental delay. *POLR1A* c.3988\_3990delGAG (p.Glu1330del) was identified as a *de novo* variant in two un-

related individuals with hypertelorism, epilepsy, and developmental delay. *POLR1A* c.3649delC (p.Gln1217Argfs\*10) is a third recurrent variant previously reported by Weaver et al.<sup>7</sup> and also in individual 10<sup>10</sup> in this series, paternally inherited in both cases.

### *In vitro* assessment of *POLR1A* variants

#### *POLR1A* variants affect rRNA transcription *in vitro*

To identify the functional effects of different variants in *POLR1A*, we assessed rRNA transcription, nucleolar morphology, and nucleolar patterning *in vitro* in cells over-expressing wild-type or mutant *POLR1A*. Prior work using a similar system demonstrated that *POLR1A* derived from *POLR1A* c.1777G>C (p.Glu593Gln) (described by Weaver et al.<sup>7</sup>) not only sequesters wild-type *POLR1A* and causes it to dissociate from rDNA chromatin, but also itself binds to rDNA chromatin and prevents normal *POLR1A* from binding. Collectively, this leads to a dominant-negative effect with reduction in rRNA transcription and the formation of large nuclear bodies (nucleolar caps) containing *POLR1A*.<sup>16,31</sup> We studied eight additional variants through transient expression of each variant. As shown in Figures 2A and S2A, endogenous mAID-mClover-tagged *POLR1A* was knocked down with auxin after transfection with HALO-tagged wild-type and mutant *POLR1A*. In each of the eight transfection experiments, HALO-tagged *POLR1A* demonstrated correct localization to the nucleolus but had variable effects on rRNA synthesis. The largest effect on rRNA synthesis as determined by the EU incorporation assay was observed in cells expressing *POLR1A* c.176A>T (p.Asp59Val), c.3988\_3990delGAG (p.Glu1330del), and c.4685G>T (p.Cys1562Phe), all of which clearly demonstrated increased transcription compared to wild-type *POLR1A* (p value  $< 2.2 \times 10^{-16}$ , Figure 2B). Expression of two additional variants, c.1488G>T (p.Met496Ile) and c.3721G>A (p.Val1241Ile), also solicited a statistically significant (though quantitatively mild) increase in rRNA transcription (p value =  $4.6 \times 10^{-4}$  and 0.038, respectively). In contrast, expression of c.1178G>A (p.Arg393His) led to a decrease in rRNA transcription (p value =  $3.9 \times 10^{-9}$ ) similar to but less severe than c.1777G>C (p.Glu593Gln) (p value  $< 2.2 \times 10^{-16}$ ). Expression of the remaining two variants, c.4913C>T (p.Pro1638Leu) and c.4891G>A (p.Val1631Met), did not result in a significant difference in rRNA transcription compared to wild type.

#### *POLR1A* demonstrates variant-specific differences in nucleolar patterning

To test for *POLR1A* variant-specific effects on localization of the corresponding proteins, we quantified the nucleolar patterning of *POLR1A* generated from variant and wild-type HALO-tagged *POLR1A* using the machine-learning algorithm wndchrn. A selection of images used for this analysis is shown in Figure S3. Wndchrn classified the localization patterns of *POLR1A* foci from wild-type and nine variants (including c.1777G>C [p.Glu593Gln] from Weaver et al.<sup>7</sup>) into three groups. These groupings roughly aligned with the rRNA transcription levels quantified by

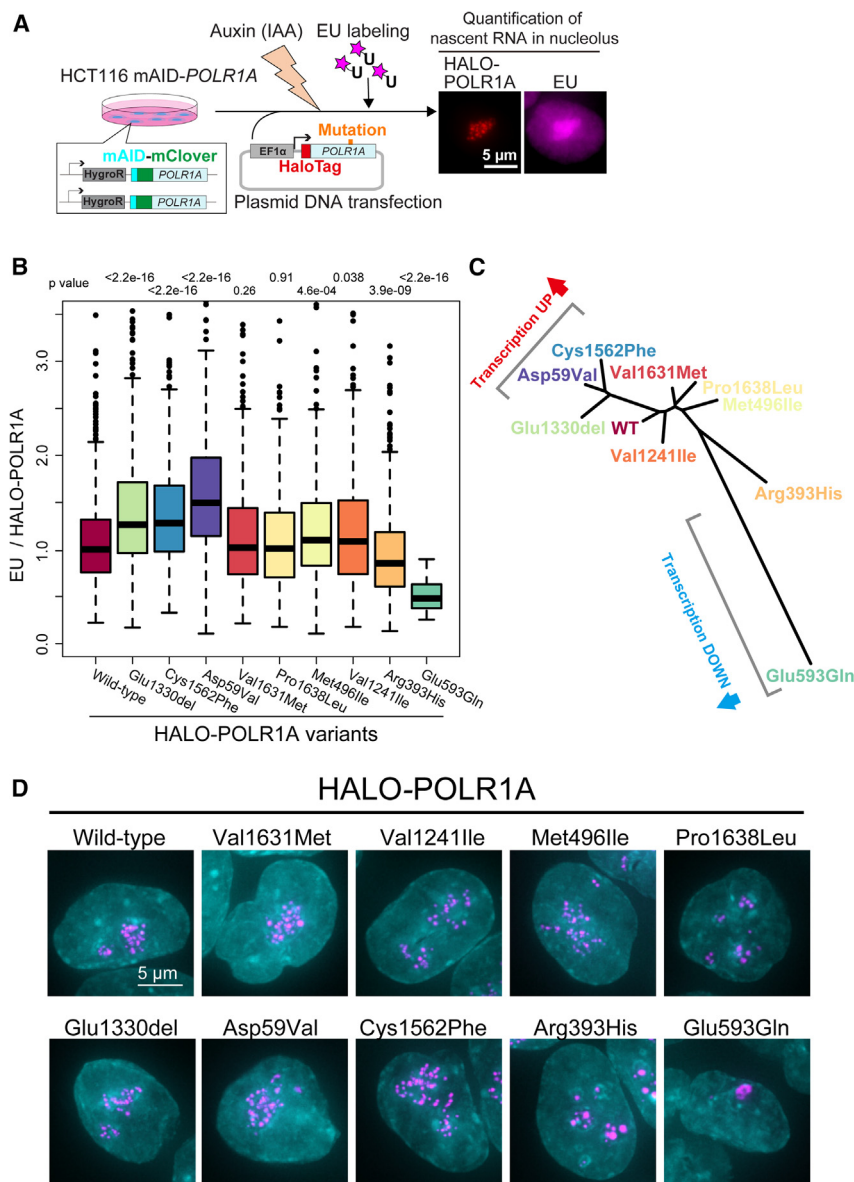

**Figure 2. Variant POLR1A effects on rRNA synthesis and nucleolar morphology**

(A) Scheme of rRNA synthesis analysis in a genome-edited HCT116 cell line. rRNA synthesis was monitored by incorporating 5-ethynyl-uridine (EU) in nucleoli after transfecting the plasmid containing a *POLR1A* variant fused with a HaloTag and subsequently adding the plant auxins, indole-3-acetic acid (IAA), for rapid degradation of endogenous *POLR1A* fused with mini-AID (mAID) and the fluorescent protein mClover (mAID + mClover). The scale bar represents 5  $\mu$ m.

(B) Boxplot of fluorescence intensity of EU normalized to HaloTag-*POLR1A* intensity in cells transiently expressing *POLR1A* corresponding to wild-type, p.Glu1330del, p.Cys1562Phe, p.Asp59Val, p.Val1631Met, p.Pro1638Leu, p.Met496Ile, p.Val1241Ile, p.Arg393His, and p.Glu593Gln *POLR1A*. Median values are indicated. p values for statistically significant difference between wild type and each variant are indicated above the boxplot of the mutant (Wilcoxon rank-sum test). n = 782 cells (wild-type *POLR1A*); n = 551 cells (Glu1330del), p <  $2.2 \times 10^{-16}$ ; n = 409 cells (Cys1562Phe), p <  $2.2 \times 10^{-16}$ ; n = 267 cells (Asp59Val), n = 381 cells (Val1631Met), p = 0.26; n = 384 cells (Pro1638Leu), p = 0.91; n = 317 cells (Met496Ile), p =  $4.6 \times 10^{-4}$ ; n = 496 cells (Val1241Ile), p = 0.038; n = 439 cells (Arg393His), p =  $3.9 \times 10^{-9}$ ; and n = 28 cells (Glu593Gln), p <  $2.2 \times 10^{-16}$ .

(C) Phylogeny shows the similarity of the nucleolar morphologies of wild type and nine *POLR1A* variants. HaloTag-*POLR1A* image sets were analyzed with the *wndchr* program.

(D) Localization of fluorescently labeled HaloTag-*POLR1A* variants. Each merged image of DAPI (cyan) and HaloTag-*POLR1A* variants (magenta) is the image with the average feature score out of a set of HaloTag-*POLR1A* variant images classified by FLDA with Top 438 features out of 2,919 image features computed by the *wndchr* program. The scale bar represents 5  $\mu$ m.

EU incorporation described in the previous section. The first group consists of *POLR1A* p.Cys1562Phe, p.Glu1330del, and p.Asp59Val, all of which showed increased transcription. The second group includes wild-type, p.Pro1638Leu, and p.Val1631Met (no change in transcription), and p.Val1241Ile and p.Met496Ile (mild increase in transcription). The third group includes p.(Arg393His) and p.Glu593Gln, both of which demonstrated reduced transcription compared to wild type (Figure 2C).

We then further investigated the image features representative of each variant *POLR1A*'s localization, particularly those in the transcription-upregulated group (p.Cys1562Phe, p.Glu1330del, and p.Asp59Val) and the transcription-downregulated group (p.Arg393His and p.Glu593Gln), using 3D scatter plotting based on Fisher's linear discrimi-

nant analysis (FLDA) (Figure S2B, material and methods). The plot used 438 discriminative image features that were computed and extracted by *wndchr* (Figure S2B). Representative images of the average morphology of cells expressing each of the *POLR1A* variants are found in Figure 2D. The variants that elicited decreased rRNA synthesis (c.1178G>A [p.Arg393His] and c.1777G>C [p.Glu593Gln]) also generated larger and fewer *POLR1A* foci than wild-type controls, with *POLR1A* p.Glu593Gln forming the largest and fewest foci. This phenotype is consistent with nucleolar dysfunction (Figure S3). However, these parameters did not yield common features for the transcription-upregulated variants (c.176A>T [p.Asp59Val], c.3988\_3990delGAG [p.Glu1330del], and c.4685G>T [p.Cys1562Phe]). Therefore, we selected outlier images from each of these image sets for



additional analysis to see whether they might reveal exaggerated morphology. Outlier Halo-tagged POLR1A p.Glu1330-del, p.Asp59Val, and p.Cys1562Phe images were chosen based on their distance from others in the 3D scatter plotting (Figures S2B and S4). Analysis of their morphology revealed that foci number is increased compared to wild type and that the foci are extended and linear (indicated as a line-like foci pattern in Figure S4). Taken together, modeling of POLR1A variant *in vitro* shows differences in nucleolar morphology (based on POLR1A foci) has some correlation with rRNA transcription capacity or status.

### ***In vivo* assessment of spatiotemporal requirement for *Polr1a***

#### ***Polr1a* expression exhibits spatiotemporal variation throughout embryonic development**

To examine whether there are distinct requirements for *Polr1a* across the different developing tissues that contribute to the diverse phenotypes observed in our human cohort, we first examined the expression of *Polr1a* in mouse embryos. The murine *Polr1a<sup>tm1a</sup>* allele consists of the first four exons of *Polr1a* followed by a splice acceptor, internal ribosomal entry sequence, and *LacZ* cassette (Figure S5A), allowing for analysis of *Polr1a* expression via X-gal staining. Embryonic expression of *Polr1a* is initially ubiquitous at E7.5 and E8.5 but becomes selectively enriched in certain tissues including the branchial arches and frontonasal prominences by E9.5 (Figure S5B), consistent with other recently published data.<sup>8</sup> At E10.5, *Polr1a* remains broadly expressed throughout the embryo with persistent enrichment in the frontonasal prominences, branchial arches, and limb buds as well as the developing heart. This demonstrates the global activity of *Polr1a* in all tissues during development and the dynamics of elevated expression in the structures affected in the human cohort—face, heart, brain, and limbs.

#### ***Polr1a<sup>null</sup>* and *Polr1a<sup>C1559F</sup>* homozygosity causes early embryonic lethality**

To investigate whether different *Polr1a* alleles have unique effects on mouse development, we initially chose three distinct alleles for study: a null allele (*Polr1a<sup>tm1a</sup>/Polr1a<sup>tm1d</sup>*) and two missense variants orthologous to variants in the human cohort, *Polr1a<sup>C1559F</sup>* and *Polr1a<sup>P1635L</sup>* (orthologous to POLR1A p.Cys1562Phe and p.Pro1638Leu found in individuals 15/16 and 18, respectively). *Polr1a<sup>tm1a</sup>* is a null allele due to presence of a stop codon after the *LacZ* cassette and *Polr1a<sup>tm1d</sup>* contains a multi-exon deletion (Figure S5A). Of note, four individuals in the cohort had variants with predicted premature protein truncation (individuals 3, 9, 10, and 12).

*Polr1a<sup>null/+</sup>* adult mice are healthy and fertile. We intercrossed *Polr1a<sup>null/+</sup>* heterozygotes and identified no *Polr1a<sup>null/null</sup>* mutants among 22 E9.5–E10.5 embryos, consistent with a recent study that observed pre-implantation lethality of homozygous null embryos by E3.5 (Table S4).<sup>8</sup> Heterozygous animals appeared in expected Mendelian ratios (14/22 heterozygotes, 8/22 WT, chi-square  $p = 0.7$ ). *Polr1a<sup>null/+</sup>* animals occurred in the expected sex dis-

tribution with no apparent abnormal phenotypes ( $n = 100$ , chi-square  $p = 0.258$ ).

Next, we assessed survival and phenotypes of mice with missense variants, *Polr1a<sup>C1559F</sup>* and *Polr1a<sup>P1635L</sup>*. Adult heterozygotes for both lines appeared at the expected sex distribution and were healthy and fertile. To determine whether animals homozygous for either variant exhibited abnormal phenotypes, we crossed heterozygous mice and collected offspring at E7.5, E8.5, E9.5, P0, and post-weaning. No *Polr1a<sup>C1559F/C1559F</sup>* embryos were found ( $n = 33$  embryos, Table S4), consistent with data for homozygous null embryos. In contrast, we found *Polr1a<sup>P1635L/P1635L</sup>* mice in expected Mendelian ratios for genotype and sex at weaning (P21) and with normal phenotypes at 6 and 12 months ( $n = 20$ , Table S4). We then crossed *Polr1a<sup>P1635L/+</sup>* and *Polr1a<sup>null/+</sup>* mice and found *Polr1a<sup>P1635L/null</sup>* adult animals in the expected Mendelian ratios and with normal phenotypes ( $n = 40$ ). We found similar results with the *Polr1a<sup>A1632V\_P1635L</sup>* line, with expected Mendelian ratios at weaning for the *Polr1a<sup>A1632V\_P1635L</sup> × Polr1a<sup>A1632V\_P1635L</sup>* cross ( $n = 29$ ) as well as homozygous *Polr1a<sup>A1632V\_P1635L/A1632V\_P1635L</sup> × Polr1a<sup>null/+</sup>* cross ( $n = 28$ ). Body morphometrics and echocardiograms of adult *Polr1a<sup>P1635L/P1635L</sup>* and *Polr1a<sup>A1632V\_P1635L/A1632V\_P1635L</sup>* animals showed no difference from controls (Figure S6). We therefore concluded that *Polr1a<sup>C1559F/C1559F</sup>* causes embryonic lethality (<E7), like the null allele, while *Polr1a<sup>P1635L/P1635L</sup>* is well tolerated in mice.

#### **Tissue-specific effects of *Polr1a* alleles**

To circumvent the early lethality of *Polr1a<sup>null/null</sup>* embryos and examine tissue-specific effects of loss of *Polr1a*, we generated *Polr1a<sup>null/flox</sup>; Cre* conditional loss-of-function embryos. Further, to circumvent the early lethality of our *Polr1a<sup>C1559F/C1559F</sup>* embryos and study tissue-specific effects of Cys1559Phe *in vivo*, we generated *Polr1a<sup>C1559F/flox</sup>; Cre* embryos. Cre drivers were chosen based on the tissues affected in the human cohort. The predominant phenotypes present included craniofacial, cardiac, and neurodevelopmental anomalies. We therefore chose *Wnt1-Cre* and *Sox10-Cre* to examine pre-migratory and migratory neural crest cells (NCCs), respectively, as NCCs are critical for craniofacial morphogenesis and also contribute to the cardiac outflow tract.<sup>32</sup> *Mef2c-AHF-Cre* is expressed in the anterior heart field,<sup>27</sup> while *Foxg1-Cre* is expressed in the forebrain.<sup>28</sup> Over the course of our experiments, we utilized multiple null alleles of *Polr1a* (*tm1a*, *tm1d*) in combination with the conditional (flox) allele, as well as flox/flox, all of which we confirmed to have identical phenotypes (Figure S5C) and thus for simplicity we will use “null” interchangeably for *tm1a*, *tm1d*, and flox in combination with a second flox allele from this point forward. For each cross, we first determined the survival of mutant embryos (*Polr1a<sup>C1559F/flox</sup>; Cre* or *Polr1a<sup>null/flox</sup>; Cre*) and then proceeded with phenotyping. Survival characteristics for all mutants are summarized in Table S4.

### **Wnt1-cre-mediated ablation of Polr1a results in craniofacial abnormalities, persistent truncus arteriosus, and mid-gestation lethality**

Neural crest cells (NCCs) are a multipotent cell population that are induced at the neural plate border, migrate throughout the embryo, and differentiate into multiple cell types. NCCs contribute to several tissues including the craniofacial cartilage and bone, outflow tract of the heart, vascular smooth muscle cells, and enteric nervous system, among others.<sup>33</sup> *Wnt1-Cre* is expressed in pre-migratory neural crest cells and is used for functional testing and tracing of the NCC lineage.<sup>25</sup> *Polr1a*<sup>null/flox</sup>; *Wnt1-Cre* embryos were observed in Mendelian ratios until E12.5 but were not observed at later stages (Table S4). *Polr1a*<sup>null/flox</sup>; *Wnt1-Cre* embryos demonstrate hypoplastic facial prominences evident as early as E9.25, and their appearance becomes more discrepant from wild-type littermates with age progression (Figures 3A and 3B). Lineage tracing using a *ROSA*<sup>dTom/GFP</sup> allele revealed a reduction in GFP-marked NCCs in E9.5 *Polr1a*<sup>null/flox</sup>; *Wnt1-Cre* mutants (Figure S7), with almost complete loss of NCCs by E12 (Figure 3A, right). These results are congruent with recently described *Polr1a*<sup>flox/flox</sup>; *Wnt1-Cre* mutants.<sup>8</sup> In contrast, *Polr1a*<sup>C1559F/flox</sup>; *Wnt1-Cre* embryos exhibit a less severe phenotype, with some preservation of GFP-labeled NCCs evident at E12.25 (Figure 3A, middle), suggesting that *Polr1a* c.4676G>T (p.Cys1559Phe) has a hypomorphic effect compared to *Polr1a* null. Of note, the abnormal phenotypes of both mutants demonstrated complete penetrance with minimal variability among mutants of same genotype.

Prior work demonstrated neuroepithelial cell apoptosis in *polr1a*-null zebrafish<sup>7,34</sup> and NCC apoptosis in *Polr1a*<sup>flox/flox</sup>; *Wnt1-Cre* embryos.<sup>8</sup> Therefore, we hypothesized that the less severely affected *Polr1a*<sup>C1559F/flox</sup>; *Wnt1-Cre* mutants would exhibit less NCC apoptosis in facial primordia compared to *Polr1a*<sup>null/flox</sup>; *Wnt1-Cre* mutants. Whole-mount immunohistochemistry (WMIHC) with cleaved caspase-3 (CC3) antibody confirmed variably increased apoptosis in the branchial arches and frontonasal prominences of E8.25–9.5 *Polr1a*<sup>C1559F/flox</sup>; *Wnt1-Cre* mutants (n = 3) compared to wild-type embryos. There was variability in CC3 detection with age, with the most robust localization occurring at E9.5 (Figure 3B, middle). Less CC3 was observed at 11-somite and 18-somite stages (Figure S7A). In contrast, *Polr1a*<sup>null/flox</sup>; *Wnt1-Cre* embryos have lost almost all NCCs by E10 (n = 4), with markedly smaller branchial arches and frontonasal prominences and fewer CC3-positive cells (Figure 3B, right). However, at E9 (n = 4), there is clearly increased localization of CC3 in the remaining hypoplastic arch, which contains some GFP-marked NCCs (Figure S7B).

The mid-gestation lethality of *Polr1a*<sup>null/flox</sup>; *Wnt1-Cre* mutant embryos is suggestive of cardiac or vascular pathology,<sup>35</sup> which we hypothesized was due to perturbed NCC contribution to these organ systems. NCCs form the septum of the outflow tract and contribute to aortic arch arteries. As ablation of NCCs causes outflow tract and

looping defects,<sup>36</sup> we examined whether *Polr1a*<sup>null/flox</sup>; *Wnt1-Cre* or *Polr1a*<sup>C1559F/flox</sup>; *Wnt1-Cre* mutants displayed structural cardiac anomalies. Cardiac sections from E12 mutants (n = 3) revealed persistent truncus arteriosus in *Polr1a*<sup>null/flox</sup>; *Wnt1-Cre* mutants (Figure 3C, right) while the outflow tract was normally septated in *Polr1a*<sup>C1559F/flox</sup>; *Wnt1-Cre* embryos (Figure 3C, middle). This is consistent with the IHC data, suggesting that *Polr1a*<sup>C1559F</sup> causes NCC apoptosis at a slightly later developmental stage than the null allele. To further investigate the cardiovascular status of mutants with conditional deletion of *Polr1a* in pre-migratory NCCs, we pursued additional investigation of the myocardium in *Polr1a*<sup>null/flox</sup>; *Wnt1-Cre* and *Polr1a*<sup>C1559F/flox</sup>; *Wnt1-Cre* embryos, and vasculature in *Polr1a*<sup>flox/flox</sup>; *Wnt1-Cre* embryos.

Immunostaining for PECAM1, a marker of endothelial cells, revealed the presence of hypoplastic branchial arch arteries, and ink injections uncovered diffuse vascular leakage in *Polr1a*<sup>flox/flox</sup>; *Wnt1-Cre* embryos at E11.5 (Figure 3D, n = 5; and Figure 3E, n = 3). Given a previous report of ventricular myocardium thinning due to outflow tract anomalies in NCC mutants,<sup>37</sup> we quantified myocardial thickness in *Polr1a*<sup>null/flox</sup>; *Wnt1-Cre* and *Polr1a*<sup>C1559F/flox</sup>; *Wnt1-Cre* mutants at E12.5. We observed thinning of the left ventricular wall only in *Polr1a*<sup>null/flox</sup>; *Wnt1-Cre* mutants versus control (n = 3 embryos per genotype, p = 0.022, Figure 3F). Therefore, mid-gestation lethality of *Polr1a*<sup>null/flox</sup>; *Wnt1-Cre* mutants is likely due to abnormal cardiovascular development, which also stems from perturbed NCC development. In contrast, the less severely affected *Polr1a*<sup>C1559F/flox</sup>; *Wnt1-Cre* mutants do not have ventricular thinning. We did not determine the exact timepoint of lethality for the *Polr1a*<sup>C1559F/flox</sup>; *Wnt1-Cre* mutants, but with completely penetrant clefting, the mutants would not survive after birth. Overall, these results indicate that: (1) *Polr1a* c.4676G>T (p. Cys1559Phe) has a less severe effect than the null allele when expressed in combination with *Polr1a* conditional allele and *Wnt1-Cre*; (2) a complete loss of *Polr1a* is detrimental to pre-migratory NCCs, including those that populate the OFT; and (3) NCC death underlies the hypoplastic craniofacial structures in both mutants.

### **Sox10-cre-mediated ablation of Polr1a results in less severe phenotypes**

Migrating NCCs exhibit a lower rate of rRNA transcription compared to pre-migratory NCCs and thus should be less susceptible to disrupted ribosome biogenesis and NCC death.<sup>8</sup> We therefore conditionally deleted *Polr1a* in migratory NCCs using *Sox10-Cre*<sup>26</sup> and hypothesized that *Polr1a*<sup>null/flox</sup>; *Sox10-Cre* and *Polr1a*<sup>C1559F/flox</sup>; *Sox10-Cre* mutants would have less severe phenotypes than the corresponding *Wnt1-Cre* mutants.

*Polr1a*<sup>flox/null</sup>; *Sox10-Cre* mutants were recovered in expected Mendelian ratios through E17, demonstrating improved survival relative to *Wnt1-Cre* mutants. These mutants have completely penetrant yet slightly variable phenotypes. The majority had cleft faces with cleft or absent palate as well as severely under-developed nasal,

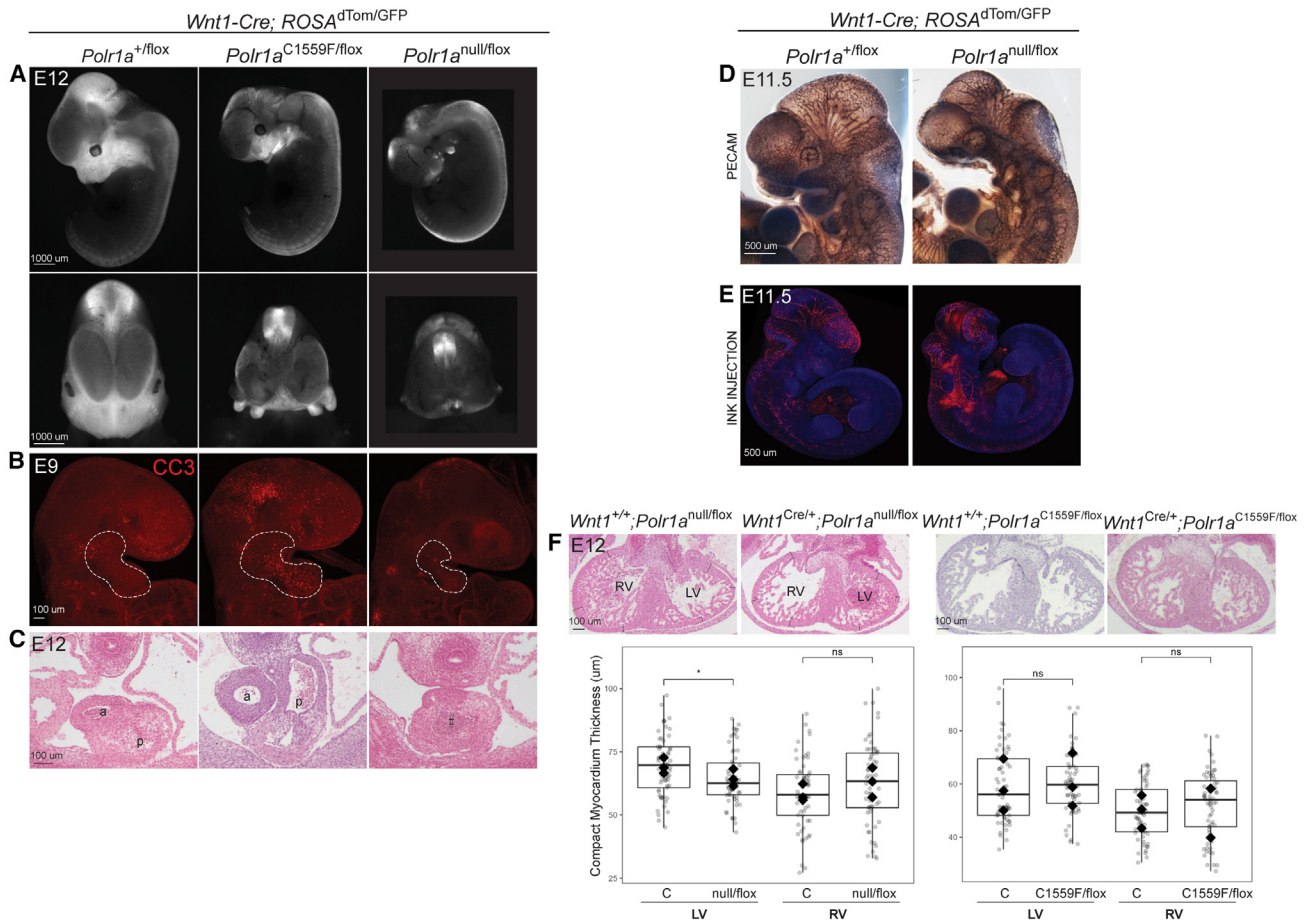

**Figure 3. *Polr1a* craniofacial model**

(A) *Polr1a*<sup>null/flox</sup>; *Wnt1-Cre* embryos demonstrate more hypoplastic craniofacial primordia at E12 compared to *Polr1a*<sup>C1559F/flox</sup>; *Wnt1-Cre*. The scale bar represents 1,000  $\mu$ m. (B) At E9, cell death (indicated by CC3 accumulation) is prominent in the first arch (dashed white line) of the *Polr1a*<sup>C1559F/flox</sup>; *Wnt1-Cre* mutant. The first arch of the *Polr1a*<sup>null/flox</sup>; *Wnt1-Cre* mutant has less CC3 but overall is smaller than in *Polr1a*<sup>C1559F/flox</sup>; *Wnt1-Cre* at the same stage. The scale bar represents 100  $\mu$ m. (C) The outflow tract of *Polr1a*<sup>null/flox</sup>; *Wnt1-Cre* E12 mutants is not septated while the *Polr1a*<sup>C1559F/flox</sup>; *Wnt1-Cre* outflow tract is. (D) PECAM1 staining shows abnormal vasculature in *Polr1a*<sup>null/flox</sup>; *Wnt1-Cre* embryos at E11.5. The scale bar represents 100  $\mu$ m. (E) Ink injections demonstrating *Polr1a*<sup>null/flox</sup>; *Wnt1-Cre* embryos have vascular leakage at E11.5. The scale bar represents 100  $\mu$ m. (F) Compact myocardium of *Polr1a*<sup>null/flox</sup>; *Wnt1-Cre* left ventricle is thinner than control at E12 (left). There is no difference in compact myocardium thickness between control and *Polr1a*<sup>C1559F/flox</sup>; *Wnt1-Cre* mutants at E12 (right). Points are individual myocardium measurements and filled diamonds are the average for each embryo,  $n = 3$  for each genotype. Of note, two diamonds are superimposed on the C1559F/flox plot. a, aorta; p, pulmonary trunk. p values calculated via Student's t test (equal variance, two tailed, two sample). \* $p < 0.05$ . The scale bar represents 100  $\mu$ m.

frontal, and squamosal bones ( $n = 5$  at E17 and  $n = 3$  at E16 mutants, [Figures S8A](#) and [S8B](#)). Among 19 E14–E17 mutants, 6 had a median mandibular cleft ([Figure S8A](#), bottom). The mandibular length of E17 *Polr1a*<sup>null/flox</sup>; *Sox10-Cre* mutants was significantly shorter than controls ([Figure S8B](#)). Concordantly, WMIHC in E9.5 *Polr1a*<sup>null/flox</sup>; *Sox10-Cre* embryos ( $n = 4$  mutants) demonstrated robust CC3 localization in the first branchial arch ([Figure S8C](#)). In contrast to *Polr1a*<sup>null/flox</sup>; *Wnt1-Cre* mutants, the outflow tract of the *Polr1a*<sup>null/flox</sup>; *Sox10-Cre* mutants appeared normally septated ([Figure S8D](#)).

Given our observation that *Polr1a*<sup>C1559F/flox</sup>; *Wnt1-Cre* embryos are less severely affected than *Polr1a*<sup>null/flox</sup>; *Wnt1-Cre* embryos, we hypothesized the same trend would be observed with *Sox10-Cre*. *Polr1a*<sup>C1559F/flox</sup>; *Sox10-Cre* em-

bryos had a less severe and more variable phenotype than *Polr1a*<sup>null/flox</sup>; *Sox10-Cre* mutants. Among seven E14–E15 mutants, five had a cleft palate, two of which also had median lip notches and one of which had a cleft face ([Figure S8E](#)). The remaining two had normal faces and intact palates (data not shown). This provides further support for *Polr1a*<sup>C1559F</sup> having a less severe effect on neural crest cells than *Polr1a*<sup>null</sup>.

In summary, NCC death in *Sox10-Cre* mutants occurs slightly later than in *Wnt1-Cre* mutants, coincident with later activation of *Sox10-Cre* in migratory NCCs versus pre-migratory NCCs with *Wnt1-Cre*. Further, the *Polr1a* c.4676G>T (p.Cys1559Phe) allele has a less severe effect than the null allele in both migratory and pre-migratory NCCs. This supports the concept of

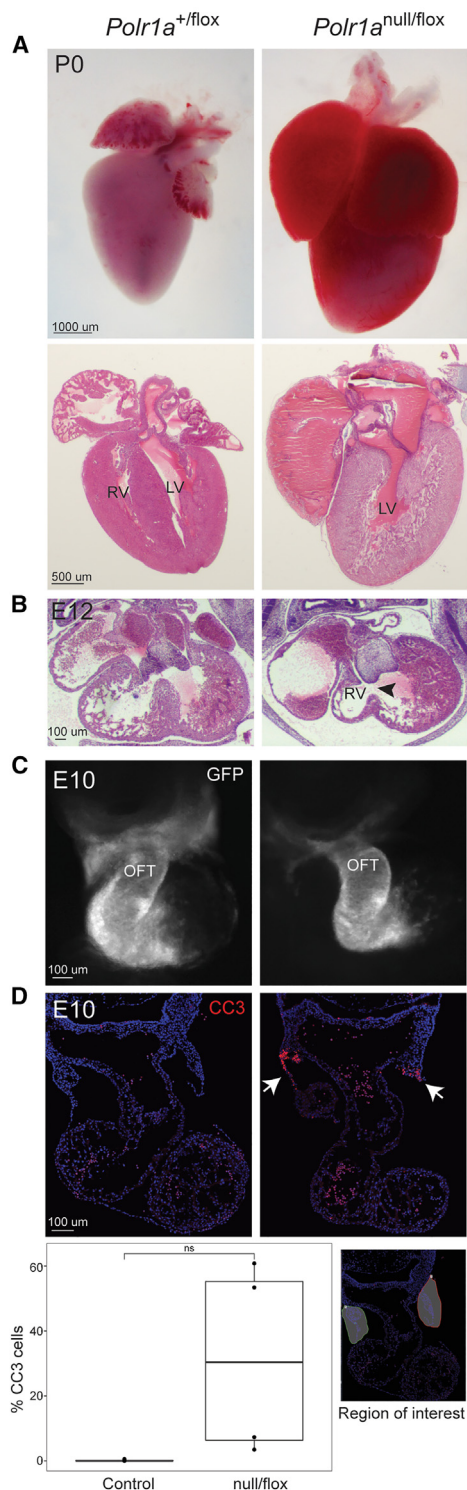

**Figure 4. *Polr1a* cardiovascular model**

(A) Hearts from *Polr1a*<sup>null/flox</sup>; *Mef2c-AHF-Cre* neonates (P0) demonstrate gross enlargement compared to control, and histology reveals only a single ventricle is present. The scale bar represents 1,000  $\mu$ m (top) and 500  $\mu$ m (bottom).

(B) At E12, *Polr1a*<sup>null/flox</sup>; *Mef2c-AHF-Cre* mutants have an underdeveloped right ventricle and large ventricular septal defect (black arrowhead). The scale bar represents 100  $\mu$ m.

variant-specific effects contributing to phenotypic variability in humans.

***Polr1a* ablation in the anterior heart field results in loss of right sided structures due to cell death**

As described above, *Polr1a*<sup>null/flox</sup>; *Wnt1-Cre* embryos exhibit truncus arteriosus (Figure 3C) consistent with the known role of NCCs in outflow tract septation.<sup>36</sup> The heart defects observed in our cohort were primarily septal defects, although individual 18 had more complex congenital heart defects (bicuspid aortic valve, aortic and pulmonary aneurysm, partial AV canal). The second heart field (SHF) is a population of cells adjacent to the primary heart field that migrate into the heart during early organogenesis and are required for formation of the right ventricle, interventricular septum, and smooth muscle of the proximal outflow tract.<sup>38</sup> Reciprocal interactions between SHF and NCCs are required for correct patterning of the cardiac valves, chambers, and outflow tract.<sup>39</sup> We therefore hypothesized that disruption of the SHF may contribute to congenital heart defects in our cohort. To determine whether *Polr1a* is required by the SHF, we generated *Polr1a*<sup>null/flox</sup>; *Mef2c-AHF-Cre* mutants. *Mef2c* is a transcription factor that is expressed specifically by cells in the SHF beginning at approximately E7.5.<sup>40</sup> *Polr1a*<sup>null/flox</sup>; *Mef2c-AHF-Cre* mutants survive until E18/P0 ( $n = 4$ ) but have enlarged hearts (due to blood pooling) with a single ventricle (Figure 4A). Hypoplastic right-sided cardiac structures become evident at mid-gestation, with a shortened outflow tract at E10 (Figure 4C) and primordial right ventricle with a large ventricular septal defect (black arrowhead) at E12 (Figure 4B). Although statistically not significant when quantified, immunohistochemistry with CC3 antibody in E10 cardiac sections does demonstrate an observable focal area of increased apoptosis in the SHF of mutants (Figure 4D) ( $n = 4$  embryos per genotype). Therefore, loss of *Polr1a* causes cells of the SHF to die, leading to structural cardiac anomalies that reflect the loss of this cell population. While the cardiac phenotype in *Polr1a*<sup>null/flox</sup>; *Mef2c-AHF-Cre* mutants is more severe than in any of the human individuals, the results overall support the association of congenital heart defects with *POLR1A* variants.

***Polr1a* ablation in forebrain progenitors results in hypoplastic telencephalon due to cell death**

Given that neurodevelopmental abnormalities were observed in 14/18 individuals in our cohort, we next sought to determine the effects of mutant (null and c.4676G>T [p.Cys1559Phe]) *Polr1a* in neurological lineages. *Polr1a* c.4676G>T (p.Cys1559Phe) was chosen because the

(C) At E10 the primordial right ventricle is smaller in width compared to control. The scale bar represents 100  $\mu$ m.

(D) At E10, section immunohistochemistry demonstrates a trend toward increased abundance of CC3 in the anterior heart field of *Polr1a*<sup>null/flox</sup>; *Mef2c-AHF-Cre* mutants (white arrows). Each genotype had  $n = 4$  and  $p$  values were calculated via Welch's  $t$  test (unequal variance, two tailed, two sample). Unequal variance was observed as a litter effect. ns, not significant ( $p > 0.05$ ). OFT, outflow tract. The scale bar represents 100  $\mu$ m.

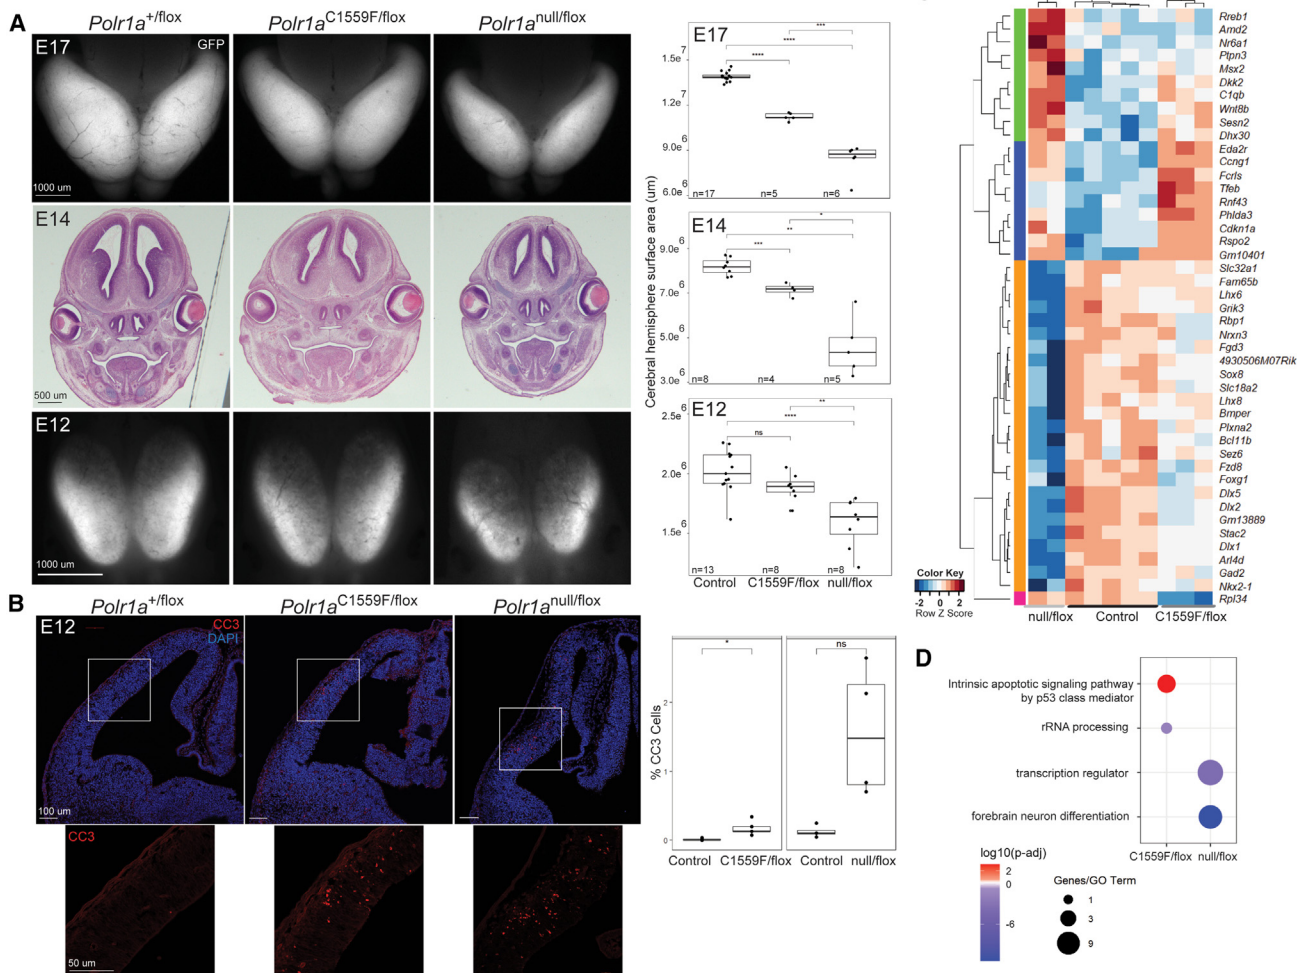

**Figure 5. *Polr1a* central nervous system model**

(A) At E12, cerebral cortex area is reduced in *Polr1a*<sup>null/flox</sup>; *Foxg1-Cre* compared to both *Polr1a*<sup>C1559F/flox</sup>; *Foxg1-Cre* and control. At E14 and E17, the *Polr1a*<sup>null/flox</sup> mutant cortex is smaller than *Polr1a*<sup>C1559F/flox</sup>, and both are smaller than control. Numbers of embryos per genotype are shown on the graph for each stage. Comparisons were made via Welch's t test (unequal variance, 2-tailed, 2-sample) for E17 and E14 embryos and Student's t test (equal variance, 2-tailed, 2-sample) for E12 embryos. \**p* < 0.05, \*\**p* < 0.005, \*\*\**p* < 0.0005, and \*\*\*\**p* < 0.00005. The scale bars represent 1,000 μm (top), 500 μm (middle), and 1,000 μm (bottom).

(B) At E12, there is a statistically significant increase in CC3 detected in *Polr1a*<sup>C1559F/flox</sup>; *Foxg1-Cre* cortex compared to control (\**p* < 0.05). There is also increased CC3 detected in *Polr1a*<sup>null/flox</sup>; *Foxg1-Cre* cortex compared to control though it does not reach statistical significance (ns, not significant). The *Polr1a*<sup>null/flox</sup>; *Foxg1-Cre* comparison had *n* = 4 embryos per genotype, and the *Polr1a*<sup>C1559F/flox</sup>; *Foxg1-Cre* comparison had *n* = 5 embryos per genotype. *p* values were calculated by Welch's t test (unequal variance, two tailed, two sample). Bottom row shows close-up images of CC3 (red channel) in the areas indicated by white boxes in the top row images. The scale bars represent 100 μm (top) and 50 μm (bottom).

(C) Bulk RNA-seq of brains from both mutants at E12 demonstrates a subset of differentially regulated (DE) genes between each mutant and controls.

(D) Gene ontology analysis of DE genes shows increased expression of genes involved in apoptosis in *Polr1a*<sup>C1559F/flox</sup>; *Foxg1-Cre* mutants and reduced expression of genes involved in forebrain neuron differentiation and transcription regulation in *Polr1a*<sup>null/flox</sup>; *Foxg1-Cre* mutants.

orthologous human variant, c.4685G>T (p.Cys1562Phe), was found as a *de novo* variant in two unrelated individuals with infantile spasms, hypotonia, and hypertelorism (individuals 15 and 16). *Foxg1* is expressed by progenitor cells destined to form the telencephalon,<sup>28</sup> and disruptions in *FOXG1* are a cause of congenital Rett syndrome.<sup>41</sup> Thus, we generated *Polr1a*<sup>null/flox</sup>; *Foxg1-Cre* and *Polr1a*<sup>C1559F/flox</sup>; *Foxg1-Cre* embryos to study forebrain development.

Both mutant genotypes were found in Mendelian ratios at E17. At E17, *Polr1a*<sup>null/flox</sup>; *Foxg1-Cre* embryos demonstrated

marked reduction in the size of their telencephalons compared to controls. *Polr1a*<sup>C1559F/flox</sup>; *Foxg1-Cre* embryos demonstrated a less severe but still visually evident and quantifiable reduction (Figure 5A). This same pattern was observed at E14, though less discrepancy in size was present. At E12, there was not a significant difference in forebrain area between the *Polr1a*<sup>C1559F/flox</sup>; *Foxg1-Cre* mutants and controls, though both were significantly larger than *Polr1a*<sup>null/flox</sup>; *Foxg1-Cre* mutants (Figure 5A). The numbers of embryos per genotype used for analysis at each stage are

depicted on the corresponding graphs in Figure 5A. Thus, conditional deletion of *Polr1a* in the telencephalon leads to a marked decrease in telencephalon size, while the presence of *Polr1a*<sup>C1559F</sup> ameliorates the phenotype, consistent with the *Polr1a*<sup>C1559F</sup> and null alleles having variable effects.

To understand the mechanisms underlying the reduced size of the telencephalon at E17, we examined cell death using IHC for CC3 at E12. We observed a statistically significant increase in CC3 localized to *Polr1a*<sup>C1559F/flox</sup>; *Foxg1-Cre* E12 telencephalons compared to controls, with the pattern consistent with *Foxg1* expression (n = 4 mutants, Figure 5B).<sup>21</sup> In contrast, although there was a quantifiable increase in the percentage of CC3-positive cells in *Polr1a*<sup>null/flox</sup>; *Foxg1-Cre* mutants compared to controls, the difference was not statistically significant (n = 4 mutants, Figure 5B). Overall, the data demonstrate hypoplastic telencephalons in both mutants compared to controls with a more severe effect in embryos with a null allele compared to those with *Polr1a*<sup>C1559F</sup>.

To complement our IHC experiments, we performed bulk RNA sequencing on E12.5 telencephalon RNA to study gene expression differences between wild-type, *Polr1a*<sup>null/flox</sup>; *Foxg1-Cre*, and *Polr1a*<sup>C1559F/flox</sup>; *Foxg1-Cre* embryos (Figures 5C and 5D). *Polr1a*<sup>null/flox</sup>; *Foxg1-Cre* telencephalons show downregulated forebrain neuronal differentiation and transcription, while *Polr1a*<sup>C1559F/flox</sup>; *Foxg1-Cre* telencephalons exhibit upregulation of apoptosis and downregulation of rRNA processing compared to controls. Interestingly, GO analysis did not identify apoptosis as a major pathway in *Polr1a*<sup>null/flox</sup>; *Foxg1-Cre* telencephalon. This is consistent with our IHC results that identified a significant increase in CC3 in *Polr1a*<sup>C1559F/flox</sup>; *Foxg1-Cre* but not *Polr1a*<sup>null/flox</sup>; *Foxg1-Cre* telencephalons at the same timepoint. This may also align with our results in the *Wnt1-Cre* and *Sox10-Cre* mutants, wherein mutants with *Polr1a*<sup>C1559F</sup> exhibited NCC apoptosis later than mutants with *Polr1a*<sup>null</sup>. These experiments demonstrate a deleterious effect of both null and *Polr1a*<sup>C1559F</sup> alleles on forebrain development and further support *Polr1a*<sup>C1559F</sup> having a distinct effect from the null allele.

## Discussion

To date, heterozygous pathogenic variants in *POLR1A* have been reported in five individuals with mandibulofacial dysostosis and variable limb defects, collectively referred to as acrofacial dysostosis, Cincinnati-type.<sup>7,9,10</sup> Here we report a detailed phenotypic analysis of 17 previously unreported individuals and additional information on one previously reported individual, significantly expanding the human phenotypes associated with heterozygous variants in *POLR1A*. Consistent with prior reports, we note that craniofacial differences are the most prevalent phenotype and limb defects are variably present. However, we also note a significant rate of neurologic abnormalities ranging from

mild delays to refractory epilepsy. While none of the individuals in our cohort were diagnosed with leukodystrophy, bi-allelic pathogenic variants in *POLR1A* have been described in two brothers with leukodystrophy providing some prior evidence of *POLR1A* involvement in the central nervous system.<sup>11</sup> Interestingly, bi-allelic pathogenic variants encoding another subunit of Pol I, *POLR1C*, are associated with both TCS and leukodystrophy. Most often the craniofacial and leukodystrophy phenotypes have been mutually exclusive, although there was recently a single case of an individual with bi-allelic variants in *POLR1C* who had both craniofacial and leukodystrophy phenotypes.<sup>42</sup> This provides further evidence for the role of Pol I-mediated rRNA transcription and ribosome biogenesis in the combined pathogenesis of abnormal craniofacial and neurologic development.

In addition to neurologic abnormalities, we also note an increased incidence of congenital heart defects in our expanded cohort. This primarily consist of septal defects although individual 18 had more significant disease: aortic and pulmonary artery aneurysms requiring surgical repair, and polyvalvular abnormalities. Compared to the general population, the incidence of congenital heart defects is also higher among individuals with TCS<sup>2</sup> and with Diamond-Blackfan anemia (DBA), which are caused by pathogenic variants in genes encoding Pol I subunits and associated factors or ribosomal proteins, respectively.<sup>13,43–46</sup>

Compromised cellular function of individual *POLR1A* variants was determined by expression of mutant *POLR1A* in cell culture. Ribosomal RNA transcription, which is performed by Pol I in the nucleolus, is a rate-limiting step for ribosome biogenesis.<sup>47</sup> *POLR1A* is the largest subunit of Pol I and together with *POLR1B* forms the catalytic core of the polymerase. Our *in vitro* assessment of eight *POLR1A* variants revealed variable effects on the rate of rRNA synthesis and configuration of *POLR1A* in the nucleoli in six of the eight variants tested. Increased rRNA synthesis was clearly observed with expression of variants encoding *POLR1A* p.As-p59Val, p.Cys1562Phe, and p.Glu1330del. Further, the nucleoli of cells expressing these variants show more foci with a more linear configuration than wild type. While the significance of the linear configuration is unknown, machine learning analysis confirmed these nucleolar morphologies to be different from wild type and other variants tested that did not have increased rRNA synthesis. Two of these “transcription-up” variants, which correspond to *POLR1A* p.Cys1562Phe and p.Glu1330del, each occurred independently in two individuals with striking, primarily neurologic phenotypes (individuals 13, 14, 15, and 16). The third, p.As-p59Val, occurred in two brothers with primarily craniofacial phenotypes (individuals 1 and 2). Individuals 13, 14, 15, and 16 all have craniofacial dysmorphisms but did not have structural craniofacial defects, and all four have epilepsy, described as intractable in three individuals. Thus, their phenotype can be described as primarily neurologic in comparison to individuals 1 and 2 who have clefting and craniosynostosis without neurologic abnormalities. The cells

expressing *POLR1A* variants encoding POLR1A p.Met496Ile and p.Val1241Ile demonstrated only a slight increase in rRNA transcription compared to wild type and had minimal effect on nucleolar morphology. POLR1A p.Met496Ile was found in an individual with severe craniofacial and neurologic anomalies (individual 8 with acalvaria, infantile spasms, and developmental delay) while the p.Val1241Ile variant was found in an individual with a primarily neurologic phenotype (individual 11 with spastic dystonia). Cells expressing the remaining variant, corresponding to POLR1A p.Arg393His, had reduced rRNA transcription and formed fewer and larger nucleolar foci than wild-type protein, consistent with nucleolar dysfunction. Interestingly, this resembles (but is less severe than) the *in vitro* effect of POLR1A p.Glu593Gln, which was previously investigated *in vitro* by Ide et al.<sup>16</sup> This variant occurred as a *de novo* event in one of the first individuals described with AFD-CIN who had a severe craniofacial phenotype. The craniofacial phenotypes of individuals 4 and 5 (mother and son) with POLR1A p.Arg393His are much less severe than the individual with p.Glu593Gln (1A1 in Weaver et al.),<sup>7,16</sup> which may be consistent with a less severe reduction in rRNA synthesis. Putting this all together, we propose that variants causing increased rRNA transcription may be more likely to cause neurologic phenotypes while those causing decreased rRNA transcription are more associated with craniofacial phenotypes. However, combinations of phenotypes in individuals with transcription-up or transcription-down variants indicate that there are other mechanisms of pathogenicity. This is further supported by an apparent lack of effect on rRNA transcription or nucleolar morphology for POLR1A p.Pro1638Leu and p.Val1631Met, which were both found in individuals with craniofacial, cardiac, skeletal, and neurologic phenotypes. An alternative and/or complementary possibility is that perturbation of ribosome biogenesis in either direction (increase or decrease) is damaging in early embryogenesis, given evidence that ribosome biogenesis is a dynamic and spatiotemporally regulated process.<sup>8,48</sup>

Our *in vivo* mouse studies of an allelic series of *Polr1a* variants further support the important role of this gene in normal development across multiple tissues including neural crest, second heart field, and neuronal progenitors. Conditional deletion of *Polr1a* was detrimental to cell survival in all lineages tested, suggesting that loss of function of *Polr1a* is a plausible mechanism of pathogenicity for the structural birth defects observed in our human cohort. Interestingly, *Polr1a*<sup>C1559F</sup> led to different developmental consequences when expressed in combination with conditional knock-out of *Polr1a* in the same lineages, consistent with the results of *in vitro* studies and phenotypes of two unrelated individuals with the orthologous variant, POLR1A p.Cys1562Phe. Finally, *Polr1a*<sup>P1635L</sup>, orthologous to POLR1A p.Pro1638Leu, is well tolerated by mice, which is distinct from *Polr1a*<sup>null</sup> and *Polr1a*<sup>C1559F</sup>, both of which are embryonic lethal in homozygosity. *In vitro* studies similarly did not reveal an effect on rRNA transcription or nucleolar morphology with the corresponding

p.Pro1638Leu variant. While this raises the possibility that this variant is not causal for the individual's phenotype, there is currently no alternative or better explanation identified on her exome. Further, analysis using different inheritance models (i.e., autosomal *de novo*, homozygous recessive, compound heterozygous, X-linked *de novo*, X-linked recessive) did not identify other reportable variants.

Our large cohort allows us to detect evidence of reduced penetrance or extreme variability in the phenotypes of individuals with heterozygous *POLR1A* variants. Most notably, five individuals (1, 2, 9, 10, and 12) inherited their variant from a reportedly unaffected parent. Given the still-small numbers of reported affected individuals, it remains to be determined whether some parents heterozygous for a *POLR1A* variant found in their child truly are non-penetrant, versus having minor craniofacial features that may be hard to appreciate clinically. Extremely mild phenotypes in dominant genetic syndromes are well established for multiple genes, including *TCOF1* and *POLR1D*.<sup>2,3</sup> Consistent with these ideas, the results of our *in vitro* and *in vivo* studies demonstrate that specific genetic variants cannot fully explain phenotypic expression, and as with other dominant genetic conditions, genetic and environmental modifiers likely impact disease expression in humans. The identification of a second *de novo* likely pathogenic variant in a gene associated with variable neurologic phenotypes (*ATP1A1*) in individual 13 is an exemplary case, as we suspect that there may be some contribution to his phenotype from both (*POLR1A* and *ATP1A1*) variants.

It is of interest that the loss-of-function *POLR1A* variants seem to be associated with more extreme phenotypic variability, in that among the five individuals who inherited four variants from four asymptomatic parents (individuals 1 and 2 are siblings), three of four variants are predicted to cause loss of function (premature termination). However, these truncating variants all affected the distal (C-terminal) portion of the protein, whereas the other individual in the cohort with a truncating variant (individual 3) died in infancy from medical complications but had a *de novo* early-truncating variant.

Our study has a number of limitations. Individual phenotype information was collected retrospectively over a number of years at different institutions and thus individuals were not systematically evaluated by the same medical provider(s), an inherent problem when collating information about individuals with rare disease. Given the early embryonic lethality of homozygous null and homozygous missense mice, we used a combined *in vivo* (conditional deletion) and *in vitro* approach to evaluate the effects of *Polr1a* alleles on development, rRNA transcription, and nucleolar morphology. This contrasts with the individuals in this cohort, who are all heterozygous for their respective *POLR1A* variants. *POLR1A* demonstrates significant constraint against loss-of-function variants in the general population; therefore, it is likely that bi-allelic null variants in *POLR1A* would be incompatible with

survival in humans as well.<sup>49</sup> In further support of this idea, few reports of individuals with bi-allelic variants in *POLR1A* exist. There is one report of two brothers who are homozygous for missense *POLR1A* variants. Finally, the majority of the variants were studied *in vitro* which by definition removes developmental spatiotemporal variables. However, it is not economically feasible to generate knock-in mouse models for such a large number of variants. Our prioritized approach thus likely represents the best way to evaluate developmental and functional effects of an allelic series of *POLR1A* variants.

In conclusion, we have described a large cohort of individuals with heterozygous variants in *POLR1A* and used a combination of *in vivo* and *in vitro* models to demonstrate that reduced function of *POLR1A* leads to craniofacial, neurologic, and cardiovascular abnormalities. Our work represents a comprehensive assessment of the role of *Polr1a* in mammalian development and provides evidence that there are at least some variant-specific effects contributing to phenotypic variability among individuals with heterozygous variants in *POLR1A*. The phenotype originally described as acrofacial dysostosis, Cincinnati-type, constitutes only a subset of presentations now associated with heterozygous variants in *POLR1A*. Further work in our *Polr1a*<sup>C1559F</sup> mouse model could lead to targeted therapies, particularly for the drug-resistant epilepsy found in some individuals.

### Data and code availability

The accession number for the raw RNA-seq reads and metadata reported in this paper is located in the Gene Expression Omnibus (GEO: GSE206197). All Linux and R scripts, and their outputs, have been archived to the Zenodo repository (Zenodo: [10.5281/zenodo.7022932](https://doi.org/10.5281/zenodo.7022932)).

Original data underlying this manuscript that was generated at the Stowers Institute can be accessed from the Stowers Original Data Repository (Stowers: [LIBPB-2376](https://doi.org/10.1016/j.ajhg.2023.03.014)).

### Supplemental information

Supplemental information can be found online at <https://doi.org/10.1016/j.ajhg.2023.03.014>.

### Acknowledgments

We thank the individuals and families for their willingness to be included in this manuscript, the CCHMC TG Core for generation of knock-in *Polr1a* lines, and the CICRL for performing echocardiography. We thank Katherine Yutzey, PhD, for her critical review of the manuscript and insightful discussions concerning data and conclusions. We thank Gang Wu, PhD, for assistance with RNA-seq analysis. We thank Hiroko Ochi and Hiroshi Tamano for sample preparation for the *in vitro* assessment of rRNA transcription and assistance with *wndchrn*'s initial setup, respectively.

This work was funded by the National Institutes of Health National Heart Lung and Blood Institute K08 HL143177-01A1 (K.N.W.), the National Institute of Child Health and Human Development K12 HD028827 (K.N.W.), Cincinnati Children's Research

Foundation Center for Pediatric Genomics Pilot Proposal (K.N.W.), the Cleft Palate Foundation's Paul W. Black Grant for Emerging Researchers (K.N.W.), the National Institute of Dental and Craniofacial Research K99 (K.E.N.W.), and the Stowers Institute for Medical Research 1008 (P.A.T.). Operational Program Integrated Infrastructure, funded by the ERDF (ITMS2014+:313011V455) was provided to M.S., and M.Z. receives research support from the German Research Foundation (DFG 458949627; ZE 1213/2-1). The Acute Care Genomics study is funded by grants from the Australian Government's Medical Research Futures Fund (GHFM76747) and the Royal Children's Hospital Foundation (2020-1259). *In vitro* work was funded by the Japan Society for the Promotion of Science (JSPS) grants (22H05606, 21H02535 to S.I.; 19H05273, 20H05936 to K. Maeshima), JST CREST (JPMJCR15G2 to K. Maeshima), the Takeda Science Foundation (K. Maeshima), and the Uehara Memorial Foundation (K. Maeshima).

### Declaration of interests

A.B., M.J.G.S., K. McWalters, R.P., and R.S. are employees of GeneDx.

Received: October 26, 2022

Accepted: March 21, 2023

Published: April 18, 2023

### Web resources

DIY.transcriptomics, <https://doi.org/10.1128/mBio.01214-21>  
edgeR, <https://doi.org/10.18129/B9.bioc.edgeR>  
Ensembl, <https://doi.org/10.1093/nar/gkab1049>  
FastQC, v.0.11.9, <https://www.bioinformatics.babraham.ac.uk/projects/fastqc/>  
GenBank, <https://www.ncbi.nlm.nih.gov/genbank/>  
gprofiler2, <https://doi.org/10.12688/f1000research.24956.2>  
Image J, <https://imagej.net/software/fiji/>  
Kallisto, v.46.2, <https://doi.org/10.1038/nbt.3519>  
knitr, <https://yihui.org/knitr/>  
limma, <https://doi.org/10.1093/nar/gkv007>  
MultiQC, <https://doi.org/10.1093/bioinformatics/btw354>  
Nikon Elements Software, <https://www.microscope.healthcare.nikon.com/products/software/nis-elements>  
Python, <https://www.python.org/>  
R, v.4.2.0, <https://www.r-project.org/>  
rmarkdown, <https://rmarkdown.rstudio.com>  
scikit-learn, <https://scikit-learn.org/stable/>  
tidyverse, <https://doi.org/10.21105/joss.01686>  
TMM method, <https://doi.org/10.1186/gb-2010-11-3-r25>  
tximport, <https://doi.org/10.12688/f1000research.7563.2>  
Vevo LAB, v.5.6.1 (Build 2257), 2021, <https://www.visualsonics.com/product/software/vevo-lab>  
voom, <https://doi.org/10.1186/gb-2014-15-2-r29>  
wndchrn, <https://github.com/wnd-charm/wnd-charm>  
Zeiss Zen Blue Software, <https://www.zeiss.com/microscopy/en/products/software/zeiss-zen.html>

### References

1. Misiaszek, A.D., Girbig, M., Grötsch, H., Baudin, F., Murciano, B., Lafita, A., and Müller, C.W. (2021). Cryo-EM structures of human RNA polymerase I. *Nat. Struct. Mol. Biol.* 28, 997–1008.



2. Vincent, M., Geneviève, D., Ostertag, A., Marlin, S., Lacombe, D., Martin-Coignard, D., Coubes, C., David, A., Lyonnet, S., Vilain, C., et al. (2016). Treacher Collins syndrome: a clinical and molecular study based on a large series of patients. *Genet. Med.* *18*, 49–56.
3. Dauwerse, J.G., Dixon, J., Seland, S., Ruivenkamp, C.A.L., van Haeringen, A., Hoefsloot, L.H., Peters, D.J.M., Boers, A.C.d., Daumer-Haas, C., Maiwald, R., et al. (2011). Mutations in genes encoding subunits of RNA polymerases I and III cause Treacher Collins syndrome. *Nat. Genet.* *43*, 20–22.
4. Schaefer, E., Collet, C., Genevieve, D., Vincent, M., Lohmann, D.R., Sanchez, E., Bolender, C., Eliot, M.M., Nürnberg, G., Passos-Bueno, M.R., et al. (2014). Autosomal recessive POLR1D mutation with decrease of TCOF1 mRNA is responsible for Treacher Collins syndrome. *Genet. Med.* *16*, 720–724.
5. Thiffault, I., Wolf, N.I., Forget, D., Guerrero, K., Tran, L.T., Choquet, K., Lavallée-Adam, M., Poitras, C., Brais, B., Yoon, G., et al. (2015). Recessive mutations in POLR1C cause a leukodystrophy by impairing biogenesis of RNA polymerase III. *Nat. Commun.* *6*, 7623.
6. Sanchez, E., Laplace-Builhé, B., Mau-Them, F.T., Richard, E., Goldenberg, A., Toler, T.L., Guignard, T., Gatinois, V., Vincent, M., Blanchet, C., et al. (2020). POLR1B and neural crest cell anomalies in Treacher Collins syndrome type 4. *Genet. Med.* *22*, 547–556.
7. Weaver, K.N., Watt, K.E.N., Hufnagel, R.B., Navajas Acedo, J., Linscott, L.L., Sund, K.L., Bender, P.L., König, R., Lourenco, C.M., Hehr, U., et al. (2015). Acrofacial Dysostosis, Cincinnati Type, a Mandibulofacial Dysostosis Syndrome with Limb Anomalies, Is Caused by POLR1A Dysfunction. *Am. J. Hum. Genet.* *96*, 765–774.
8. Falcon, K.T., Watt, K.E.N., Dash, S., Zhao, R., Sakai, D., Moore, E.L., Fitriyani, S., Childers, M., Sardi, M.E., Swanson, S., et al. (2022). Dynamic regulation and requirement for ribosomal RNA transcription during mammalian development. *Proc. Natl. Acad. Sci. USA* *119*. e2116974119.
9. Shenoy, R.D., Shetty, V., Dheedene, A., Menten, B., Pandayanda Nanjappa, D., Chakraborty, G., Sips, P., de Paepe, A., Callewaert, B., and Chakraborty, A. (2021). Phenotypic and Molecular Heterogeneity in Mandibulofacial Dysostoses: A Case Series From India. *Cleft Palate Craniofac J* *59*, 1346–1351.
10. da Rocha, L.A., Pires, L.V.L., Yamamoto, G.L., Magliocco Ceroni, J.R., Honjo, R.S., de Novaes França Bisneto, E., Oliveira, L.A.N., Rosenberg, C., Krepischi, A.C.V., Passos-Bueno, M.R., et al. (2021). Congenital limb deficiency: Genetic investigation of 44 individuals presenting mainly longitudinal defects in isolated or syndromic forms. *Clin. Genet.* *100*, 615–623.
11. Kara, B., Köroğlu, Ç., Peltonen, K., Steinberg, R.C., Maraş Genç, H., Hölttä-Vuori, M., Güven, A., Kanerva, K., Kotil, T., Solakoğlu, S., et al. (2017). Severe neurodegenerative disease in brothers with homozygous mutation in POLR1A. *Eur. J. Hum. Genet.* *25*, 315–323.
12. Edvardson, S., Nicolae, C.M., Agrawal, P.B., Mignot, C., Payne, K., Prasad, A.N., Prasad, C., Sadler, L., Nava, C., Mullen, T.E., et al. (2017). Heterozygous De Novo UBTF Gain-of-Function Variant Is Associated with Neurodegeneration in Childhood. *Am. J. Hum. Genet.* *101*, 267–273.
13. Gazda, H.T., Sheen, M.R., Vlachos, A., Choemmel, V., O'Donohue, M.F., Schneider, H., Darras, N., Hasman, C., Sieff, C.A., Newburger, P.E., et al. (2008). Ribosomal protein L5 and L11 mutations are associated with cleft palate and abnormal thumbs in Diamond-Blackfan anemia patients. *Am. J. Hum. Genet.* *83*, 769–780.
14. Sobreira, N., Schiettecatte, F., Valle, D., and Hamosh, A. (2015). GeneMatcher: a matching tool for connecting investigators with an interest in the same gene. *Hum. Mutat.* *36*, 928–930.
15. Richards, S., Aziz, N., Bale, S., Bick, D., Das, S., Gastier-Foster, J., Grody, W.W., Hegde, M., Lyon, E., Spector, E., et al. (2015). Standards and guidelines for the interpretation of sequence variants: a joint consensus recommendation of the American College of Medical Genetics and Genomics and the Association for Molecular Pathology. *Genet. Med.* *17*, 405–424.
16. Ide, S., Imai, R., Ochi, H., and Maeshima, K. (2020). Transcriptional suppression of ribosomal DNA with phase separation. *Sci. Adv.* *6*, eabb5953.
17. Schindelin, J., Arganda-Carreras, I., Frise, E., Kaynig, V., Longair, M., Pietzsch, T., Preibisch, S., Rueden, C., Saalfeld, S., Schmid, B., et al. (2012). Fiji: an open-source platform for biological-image analysis. *Nat. Methods* *9*, 676–682.
18. Shamir, L., Orlov, N., Eckley, D.M., Macura, T., Johnston, J., and Goldberg, I.G. (2008). Wndchrm - an open source utility for biological image analysis. *Source Code Biol. Med.* *3*, 13.
19. Matsumori, H., Watanabe, K., Tachiwana, H., Fujita, T., Ito, Y., Tokunaga, M., Sakata-Sogawa, K., Osakada, H., Haraguchi, T., Awazu, A., et al. (2022). Ribosomal protein L5 facilitates rDNA-bundled condensate and nucleolar assembly. *Life Sci. Alliance* *5*, e202101045.
20. Felsenstein, J. (1989). PHYLIP: Phylogeny Inference Package (Version 3.2). *Cladistics* *5*, 164–166.
21. Skarnes, W.C., Rosen, B., West, A.P., Koutsourakis, M., Bushell, W., Iyer, V., Mujica, A.O., Thomas, M., Harrow, J., Cox, T., et al. (2011). A conditional knockout resource for the genome-wide study of mouse gene function. *Nature* *474*, 337–342.
22. Yuan, C.L., and Hu, Y.C. (2017). A Transgenic Core Facility's Experience in Genome Editing Revolution. *Adv. Exp. Med. Biol.* *1016*, 75–90.
23. Haeussler, M., Schönig, K., Eckert, H., Eschstruth, A., Mianné, J., Renaud, J.B., Schneider-Maunoury, S., Shkumatava, A., Teboul, L., Kent, J., et al. (2016). Evaluation of off-target and on-target scoring algorithms and integration into the guide RNA selection tool CRISPOR. *Genome Biol.* *17*, 148.
24. Scott, M.A., and Hu, Y.C. (2019). Generation of CRISPR-Edited Rodents Using a Piezo-Driven Zygote Injection Technique. *Methods Mol. Biol.* *1874*, 169–178.
25. Danielian, P.S., Muccino, D., Rowitch, D.H., Michael, S.K., and McMahon, A.P. (1998). Modification of gene activity in mouse embryos in utero by a tamoxifen-inducible form of Cre recombinase. *Curr. Biol.* *8*, 1323–1326.
26. Matsuoka, T., Ahlberg, P.E., Kessar, N., Iannarelli, P., Dennehy, U., Richardson, W.D., McMahon, A.P., and Koentges, G. (2005). Neural crest origins of the neck and shoulder. *Nature* *436*, 347–355.
27. Verzi, M.P., McCulley, D.J., De Val, S., Dodou, E., and Black, B.L. (2005). The right ventricle, outflow tract, and ventricular septum comprise a restricted expression domain within the secondary/anterior heart field. *Dev. Biol.* *287*, 134–145.
28. Kawaguchi, D., Sahara, S., Zembrzycki, A., and O'Leary, D.D.M. (2016). Generation and analysis of an improved Foxg1-IRES-Cre driver mouse line. *Dev. Biol.* *412*, 139–147.
29. Muzumdar, M.D., Tasic, B., Miyamichi, K., Li, L., and Luo, L. (2007). A global double-fluorescent Cre reporter mouse. *Genesis* *45*, 593–605.

30. Takase, Y., Tadokoro, R., and Takahashi, Y. (2013). Low cost labeling with highlighter ink efficiently visualizes developing blood vessels in avian and mouse embryos. *Dev. Growth Differ.* *55*, 792–801.
31. Ide, S., Tamura, S., and Maeshima, K. (2022). Chromatin behavior in living cells: Lessons from single-nucleosome imaging and tracking. *Bioessays* *44*, e2200043.
32. Trainor, K., and Watt, K. (2014). Neurocristopathies. In *Neural Crest Cells: Evolution, Development and Disease*, P.A. Trainor, ed. (Elsevier), pp. 361–394.
33. Gandhi, S., and Bronner, M.E. (2018). Insights into neural crest development from studies of avian embryos. *Int. J. Dev. Biol.* *62*, 183–194.
34. Watt, K.E.N., Neben, C.L., Hall, S., Merrill, A.E., and Trainor, P.A. (2018). tp53-dependent and independent signaling underlies the pathogenesis and possible prevention of Acrofacial Dysostosis-Cincinnati type. *Hum. Mol. Genet.* *27*, 2628–2643.
35. Conway, S.J., Kruzynska-Frejtag, A., Kneer, P.L., Machnicki, M., and Koushik, S.V. (2003). What cardiovascular defect does my prenatal mouse mutant have, and why? *Genesis* *35*, 1–21.
36. Yelbuz, T.M., Waldo, K.L., Kumiski, D.H., Stadt, H.A., Wolfe, R.R., Leatherbury, L., and Kirby, M.L. (2002). Shortened outflow tract leads to altered cardiac looping after neural crest ablation. *Circulation* *106*, 504–510.
37. Stottmann, R.W., Choi, M., Mishina, Y., Meyers, E.N., and Klingensmith, J. (2004). BMP receptor IA is required in mammalian neural crest cells for development of the cardiac outflow tract and ventricular myocardium. *Development* *131*, 2205–2218.
38. Waldo, K.L., Hutson, M.R., Ward, C.C., Zdanowicz, M., Stadt, H.A., Kumiski, D., Abu-Issa, R., and Kirby, M.L. (2005). Secondary heart field contributes myocardium and smooth muscle to the arterial pole of the developing heart. *Dev. Biol.* *281*, 78–90.
39. Kimberly, E., Inman, M.E., Bronner-Fraser, B., and Trainor, P.A. (2010). Role of Cardiac Neural Crest Cells in Morphogenesis of the Heart and Great Vessels. In *Heart Development and Regeneration*, N. Rosenthal and R. Harvey, eds. (Elsevier), pp. 417–439.
40. Edmondson, D.G., Lyons, G.E., Martin, J.F., and Olson, E.N. (1994). Mef2 gene expression marks the cardiac and skeletal muscle lineages during mouse embryogenesis. *Development* *120*, 1251–1263.
41. Ariani, F., Hayek, G., Rondinella, D., Artuso, R., Mencarelli, M.A., Spanhol-Rosseto, A., Pollazzon, M., Buoni, S., Spiga, O., Ricciardi, S., et al. (2008). FOXG1 is responsible for the congenital variant of Rett syndrome. *Am. J. Hum. Genet.* *83*, 89–93.
42. Gauquelin, L., Cayami, F.K., Sztricha, L., Yoon, G., Tran, L.T., Guerrero, K., Hocke, F., van Spaendonck, R.M.L., Fung, E.L., D'Arrigo, S., et al. (2019). Clinical spectrum of POLR3-related leukodystrophy caused by biallelic POLR1C pathogenic variants. *Neurol. Genet.* *5*, e369.
43. Gripp, K.W., Curry, C., Olney, A.H., Sandoval, C., Fisher, J., Chong, J.X.L., UW Center for Mendelian Genomics, Pilchman, L., Sahraoui, R., Stabley, D.L., and Sol-Church, K. (2014). Diamond-Blackfan anemia with mandibulofacial dysostosis is heterogeneous, including the novel DBA genes TSR2 and RPS28. *Am. J. Med. Genet.* *164A*, 2240–2249.
44. Landowski, M., O'Donohue, M.F., Buros, C., Ghazvinian, R., Montel-Lehry, N., Vlachos, A., Sieff, C.A., Newburger, P.E., Niewiadomska, E., Matysiak, M., et al. (2013). Novel deletion of RPL15 identified by array-comparative genomic hybridization in Diamond-Blackfan anemia. *Hum. Genet.* *132*, 1265–1274.
45. Pradat, P., Francannet, C., Harris, J.A., and Robert, E. (2003). The epidemiology of cardiovascular defects, part I: a study based on data from three large registries of congenital malformations. *Pediatr. Cardiol.* *24*, 195–221.
46. Willig, T.N., Niemeyer, C.M., Leblanc, T., Tiemann, C., Robert, A., Budde, J., Lambilliotte, A., Kohne, E., Souillet, G., Eber, S., et al. (1999). Identification of new prognosis factors from the clinical and epidemiologic analysis of a registry of 229 Diamond-Blackfan anemia patients. DBA group of Societe d'Hematologie et d'Immunologie Pediatrique (SHIP), Gesellschaft fur Padiatrische Onkologie und Hamatologie (GPOH), and the European Society for Pediatric Hematology and Immunology (ESPHI). *Pediatr. Res.* *46*, 553–561.
47. Laferté, A., Favry, E., Sentenac, A., Riva, M., Carles, C., and Chédin, S. (2006). The transcriptional activity of RNA polymerase I is a key determinant for the level of all ribosome components. *Genes Dev.* *20*, 2030–2040.
48. Chau, K.F., Shannon, M.L., Fame, R.M., Fonseca, E., Mullan, H., Johnson, M.B., Sendamarai, A.K., Springel, M.W., Laurent, B., and Lehtinen, M.K. (2018). Downregulation of ribosome biogenesis during early forebrain development. *Elife* *7*, e36998.
49. Karczewski, K.J., Francioli, L.C., Tiao, G., Cummings, B.B., Alfoldi, J., Wang, Q., Collins, R.L., Laricchia, K.M., Ganna, A., Birnbaum, D.P., et al. (2020). The mutational constraint spectrum quantified from variation in 141,456 humans. *Nature* *581*, 434–443.

**Supplemental information**

***POLR1A* variants underlie phenotypic heterogeneity**

**in craniofacial, neural, and cardiac anomalies**

**Kelly Smallwood, Kristin E.N. Watt, Satoru Ide, Kristina Baltrunaite, Chad Brunswick, Katherine Inskeep, Corrine Capannari, Margaret P. Adam, Amber Begtrup, Debora R. Bertola, Laurie Demmer, Erin Demo, Orrin Devinsky, Emily R. Gallagher, Maria J. Guillen Sacoto, Robert Jech, Boris Keren, Jennifer Kussmann, Roger Ladda, Lisa A. Lansdon, Sebastian Lunke, Anne Mardy, Kirsty McWalters, Richard Person, Laura Raiti, Noriko Saitoh, Carol J. Saunders, Rhonda Schnur, Matej Skorvanek, Susan L. Sell, Anne Slavotinek, Bonnie R. Sullivan, Zornitza Stark, Joseph D. Symonds, Tara Wenger, Sacha Weber, Sandra Whalen, Susan M. White, Juliane Winkelmann, Michael Zech, Shimriet Zeidler, Kazuhiro Maeshima, Rolf W. Stottmann, Paul A. Trainor, and K. Nicole Weaver**

### Supplemental note: Case Reports

All growth parameter standard deviations for height and weight were calculated using Centers for Disease Control (CDC) growth charts for individuals over age 2, and World Health Organization (WHO) growth charts for those under age 2 unless otherwise noted. Standard deviation for head circumference (HC) was calculated using Rollins data<sup>1</sup>. Individual genotypes and phenotypes are summarized in Table S5.

**Individual 1** is the older brother of individual 2. He had bilateral cleft lip and palate, metopic craniosynostosis, and bilateral hydroceles. Echocardiogram obtained to evaluate a murmur was normal. He had a clinical single nucleotide polymorphism (SNP) microarray which identified a likely benign 220 kb deletion at 7p12.3. He died unexpectedly at age 3 months after undergoing cleft lip repair. Post-mortem testing confirmed he shares the *POLR1A* c.176A>T; p.(Asp59Val) variant identified in his brother (Individual 2).

**Individual 2**, brother of Individual 1, presented as an infant with left-sided cleft lip and palate and metopic craniosynostosis. He had a normal echocardiogram and brain magnetic resonance imaging (MRI), both obtained due to his brother's sudden death. As an infant, he had a polysomnography study which identified mixed obstructive and central apnea, treated with supplemental oxygen. At 4 months of age, his weight gain plateaued, and he was diagnosed with frank aspiration, requiring gastrostomy tube placement. Now age 5, he has some speech difficulties (articulation and resonance) but overall development is on track. He had clinical trio exome sequencing (GeneDx, Gaithersburg, MD) which identified a paternally inherited missense variant in *POLR1A* c. 176A>T; p.(Asp59Val), which was also confirmed to be present in his deceased brother. The father of individuals 1 and 2 (not included in this series) was noted to have bitemporal narrowing and a prominent metopic ridge.

**Individual 3** was the first child to non-consanguineous parents, delivered at term following an uncomplicated pregnancy. Birth parameters were weight 3.145kg (40<sup>th</sup> centile), length 30.7cm (40<sup>th</sup> centile), head circumference 33.5cm (40<sup>th</sup> centile). She was noted to have congenital moderate-to-severe sensorineural hearing loss in the newborn period and was admitted to intensive care at 6 weeks of age due to poor feeding, lethargy and respiratory distress. She was found to have hypertrophic cardiomyopathy and elevated lactate. Physical exam was notable for microcephaly, congenital nevus on the scalp, hypotonia and micrognathia. Head circumference was 34.7 cm (<3rd centile) and weight was 3.26 kg (<3rd centile). She had a normal brain MRI. Clinical trio genome sequencing was performed as part of the Acute Care Genomics study (Victorian Clinical Genetics Services, Australia) and identified a *de novo* frameshift variant in *POLR1A* c.190delT; p.(Cys64Alafs\*42). RNA sequencing was uninformative. She died at 8 weeks of age after a 2-week hospitalization for management of respiratory distress and heart failure.

**Individual 4** is an 18-month-old male who presented to genetics for evaluation of bilateral vocal cord paralysis, feeding difficulties, and hypotonia. He was born at term with birth weight 2.7 kg, length 49.5 cm, and HC 35 cm. Vocal cord paralysis and a glottic web were diagnosed during an evaluation for inspiratory stridor. He required gastrostomy tube placement due to aspiration, and ultimately required tracheostomy for airway management. His physical exam was notable for long tapered fingers with bilateral fifth finger clinodactyly and single palmar crease on the right, mild toenail hypoplasia, and nevus flammeus on his forehead. He had tall and wide palpebral fissures, a short nose with upturned tip, and small slightly low-set ears. Echocardiogram demonstrated anomalous origin of the right coronary artery from the left cusp. Clinical trio exome sequencing (GeneDx, Gaithersburg, MD) identified a maternally inherited variant in *POLR1A* c.1178G>A; p.(Arg393His) and a maternally inherited variant in *PHEX* c.160T>C; p.(Cys54Arg) (NM\_000444.6, GRCH 38), both variants of uncertain significance. Clinical SNP microarray was normal. Pathogenic variants in *PHEX* are associated with X-linked dominant

hypophosphatemic rickets and the referring clinician for Individual 4 and his mother (Individual 5) felt that this did not fit their phenotype.

**Individual 5** is the mother of individual 4. She had congenital unilateral vocal cord paralysis, short stature (147.5 cm), small HC (< 3<sup>rd</sup>) ptosis, subaortic ventricular septal defect, myopia, and hypotonia. Prior to the exome which identified the *POLR1A* variant in herself and her son (individual 4), she had a normal karyotype and subtelomeric fluorescent in situ hybridization.

**Individual 6** is a 10-year-old female with multiple congenital anomalies: choanal atresia requiring surgical repair, hydrocephalus with C0/C1 stenosis treated with ventriculocisternostomy, and cleft palate. She was noted to have hypertelorism, low-set ears, and micrognathia. She had a normal echocardiogram. At age 10.3 years, her head circumference is 55.5 cm (+2 SD), height is 134 cm (-0.6 SD), and weight is 31 kg (-0.31 SD). Clinical exome sequencing identified a maternally inherited missense variant in *POLR1A* c.1442G>A; p.(Arg481Lys).

**Individual 7** is the mother of individual 6. She also has a cleft palate and similar facial features to Individual 6, as well as normal echocardiogram. At age 44 years, her head circumference is 57 cm (+2 SD), height is 160 cm, and weight is 110 kg.

**Individual 8** is a 2-year-old boy (now deceased) who was born at 37 weeks gestation to his parents. Prenatally, polyhydramnios was present, as well as concern for micrognathia and craniosynostosis. At birth, he was noted to have craniofacial anomalies including partial acalvaria, marked hypertelorism and telecanthus, ablepharon with bilateral upper eyelid colobomas, low-set anteriorly placed ears with thickened helices and left ear pit, and retrognathia. He had a broad nasal bridge, short columella and large, anteverted nares. He had sparse eyelashes and arched eyebrows with short, neutral palpebral fissures. His second toe overlapped third toe on the right, and his left fourth toe was displaced inferiorly with third and fifth toes overlapping it. Additionally, he had bilateral cryptorchidism, an atrial septal

defect, and right-sided hydronephrosis. Brain MRI at six days of life demonstrated right parietal ischemia and posterior fossa subdural hemorrhage. Head CT at 3 days of life revealed almost completely absent ossified calvarium above the posterior fossa (Figure S1-B). At four weeks of age, he began having seizures, requiring multiple antiepileptic drugs. He also had significant neuro-irritability. Clinical trio exome sequencing (Children's Mercy Hospital, MO) identified a *de novo* missense variant in *POLR1A* c.1488G>T; p.(Met496Ile). At age 2 years, his development globally delayed. He was able to make sounds, laugh, roll over, sit with support, enjoy tastes by mouth, and bring items to midline and pass between his hands. Growth parameters at this time were a head circumference of 55.5cm (-2.31 SD), length of 82 cm (-2.21 SD), and weight of 9.6kg (-3.15 SD). Subsequent head CT scans showed mild progression of skull ossification (Figure S1-C). He passed away at 33 months of age in his sleep.

**Individual 9** is an almost 4-year-old male who developed epileptic encephalopathy at age 2.5 years. Epilepsy is a combination of myoclonia, atonic seizures, and multifocal epileptic activity on EEG. He has experienced developmental regression since seizures began but was previously developmentally normal. His epilepsy has been refractive to multiple medications and he is currently on 5 antiepileptic medications (clobazam, topiramate, phenobarbital, brivaracetam, and rufinimide) having previously tried vigabatrin (ineffective), levetiracetam (behavioral problems), and lacosmide (ineffective). His head circumference is -1.3 SD and length is +2 SD. Trio exome sequencing identified a paternally inherited truncating variant in *POLR1A* c.2583\_2586del; p.(Asp862\*). His father has no history of developmental abnormalities and does not have epilepsy. Testing of paternal grandparents identified the variant in paternal grandfather as well.

**Individual 10**, previously reported in a cohort of congenital limb deficiency (da Rocha et al., 2021)<sup>2</sup> is a 7-year-old female born at 39 weeks gestation to healthy, non-consanguineous parents. Birth parameters were within normal range (weight 3.38 kg, 50<sup>th</sup> centile; length 47 cm, 10<sup>th</sup> centile; HC 35 cm, 75<sup>th</sup> centile, WHO growth chart). Fetal upper limb defects were diagnosed during the pregnancy and prenatal

karyotype was normal female. At birth she was noted to have a posterior cleft palate, micrognathia, radial dysplasia, and club feet. Physical examination at 9 months of age disclosed a weight of 7.5 kg (10<sup>th</sup>-25<sup>th</sup> centiles), length of 68 cm (25<sup>th</sup> centile), HC of 45 cm (50<sup>th</sup> centile), facial dysmorphisms (epicanthus, left palpebral ptosis, short nose, hypoplastic alae nasi, long philtrum, retro-micrognathia, posterior cleft palate); short and bowed forearms, with right preaxial polydactyly, adducted left thumb and 5<sup>th</sup> finger clinodactyly; mild clubbing of the feet. X-rays demonstrate duplication of the right thumb with bifid distal phalanx, short medial phalanx of the 5<sup>th</sup> fingers, radial hemimelia, as well as triphalangeal halluces. She had a normal abdominal ultrasound, echocardiogram, and cranial computed tomography (CT) scan. Surgical procedures were performed to correct the cleft palate, as well as strabismus. She evolved with normal growth and development but presenting language impairment. Genetic tests disclosed normal chromosomal microarray and normal number of repeats in 5' UTR of *EIF4A3* (for Richieri-Costa-Pereira syndrome). Exome sequencing disclosed a heterozygous, frameshift variant in *POLR1A*, c.3649delC; p.(Gln1217Argfs\*10), previously reported (Weaver et al., 2015)<sup>3</sup>, and classified as pathogenic. Segregation analysis of this variant in the parents by Sanger sequencing showed its presence in her apparently unaffected father. Review of confirmatory Sanger chromatogram demonstrated no evidence for paternal mosaicism, with equal-sized peaks in father and proband.

**Individual 11** is an 11-year-old male with mild hypertelorism, gross motor delay, and spastic dystonia of the legs requiring tendon surgery. Otherwise, he had no intellectual problems and attends normal school. He had a normal brain MRI and normal EEG. Trio exome sequencing was performed as part of a research project identifying genes responsible for movement-disorder phenotypes (Helmholtz Center Munich and Technical University of Munich, Munich, Germany), and identified a *de novo* missense variant in *POLR1A* c.3721G>A; p.(Val1241Ile).

**Individual 12** is a 4.25-year-old male with multiple anomalies including left hemifacial microsomia, unilateral radial aplasia (left), several small ventricular septal defects, and pulmonary artery stenosis.



Additionally, he had left diaphragmatic eventration, left enophthalmia with ptosis, left partial hearing loss, difficulty gaining weight but normal psychomotor development and learning. At 4 years 3 months weight is 12kg (-3.2 SD), height is 97 cm (-1.6 SD) and HC 48 cm (-2 SD). Prenatal history was significant for intrauterine growth retardation. Exome sequencing identified a maternally inherited variant in *POLR1A*, c. 3850C>T; p.(Gln1284\*). Individual 12's mother is healthy and without congenital anomalies. Review of confirmatory Sanger chromatogram demonstrated no evidence for maternal mosaicism, with equal-sized peaks in mother and proband.

**Individual 13** is a 24-year-old male with intellectual disability (non-verbal), autism, global developmental delay, hypotonia, ataxic gait, and generalized epilepsy (multi-drug resistant). Epilepsy began at age 6. Height is 162.6 cm (-1.98 SD). He struggles to maintain his weight, which is 49 kg (-2.69 SD) (body mass index 18.5). Physical exam was notable for ptosis, low-set ears, small feet with high arches and hammertoes, asymmetric thumb nailbeds with left wider than right, hypotonia, and poor coordination. Brain MRI was reportedly normal. Trio exome sequencing (GeneDx, Gaithersburg, MD) identified a *de novo* variant in *POLR1A* c.3988\_3990delGAG; p. (Glu1330del) as well as a *de novo* variant in *ATP1A1* c.2769C>A; p.(Phe923Leu) (NM\_000701.8, GRCH38). Both are classified as likely pathogenic.

Heterozygous variants in *ATP1A1* have recently been associated with a small number of cases of variable neurologic phenotypes ranging from Charcot-Marie-Tooth (peripheral neuropathy) to seizures and intellectual disability<sup>4-6</sup>. Thus, it is possible that both *de novo* variants contribute to this individual's phenotype (*ATP1A1* and *POLR1A* to neurodevelopmental abnormalities, *ATP1A1* to hammer toes and high arches, *POLR1A* to craniofacial features and wide left thumb nailbed). Of note, an individual with a missense variant in *ATP1A1* at the same codon c.2768T>A, encoding p.(Phe923Tyr) and reported by Dohrn et al (2022), did not have epilepsy.

**Individual 14** is a 6-month-old male with craniofacial anomalies, hypotonia, failure to thrive requiring gastrostomy tube placement, unilateral (left) cryptorchidism, right sided inguinal hernia, and

developmental delay. On exam he had hypertelorism and telecanthus with a broad and flat nasal bridge with an upturned nasal tip and anteverted nares, bilateral epicanthal folds, upslanting palpebral fissures, micrognathia, and low-set ears. He had trigonocephaly due to metopic craniosynostosis that was confirmed on a magnetic resonance imaging (MRI) scan of the brain and for which he underwent surgical repair with a strip craniectomy. MRI brain also showed a cavum septum pellucidum. Echocardiogram was normal. At 6 months, his head circumference was 42 cm (15<sup>th</sup> centile), length 60 cm (<3<sup>rd</sup> centile), and weight 6.68 kg (3-15<sup>th</sup> centile). He developed focal epilepsy at 2 months of age which is treated with Keppra. Trio exome sequencing (UCSF Genomic Medical Laboratory) identified a *de novo* variant in *POLR1A*, c.3988\_3990delGAG; p.(Glu1330del).

**Individual 15** is a 5-year-old male who presented at birth with neurologic and craniofacial anomalies. He was born at term to a 33-year-old gravida 1 mother. Birth weight was 3.03 kg, length 52 cm (85<sup>th</sup>), HC 33 cm (15-50<sup>th</sup>). High palate and poor suck were noted during newborn hospitalization. Echocardiogram demonstrated patent ductus arteriosus and patent foramen ovale. He was referred to genetics at 2 months of age for evaluation of hypotonia and craniofacial anomalies. On exam he had hypertelorism and telecanthus, anteverted nares, midline pseudocleft of his upper lip, and high narrow palate. He had low tone and low muscle bulk, and held his feet dorsiflexed and wrists hyperextended. Failure to thrive and poor feeding with aspiration led to gastrostomy tube placement at 6 months of age. He developed infantile spasms at 6 months of age which progressed to multi-drug resistant epilepsy. Trio exome sequencing (GeneDx, Gaithersburg, MD) identified a *de novo* variant in *POLR1A*, c.4685G>T; p.(Cys1562Phe). At age 5, he smiles and has partial head control. He is unable to roll and cannot sit independently. He is learning to communicate using eye gaze and non-verbal communication.

**Individual 16** is a 3-year-old male with hypertelorism, hypotonia, and feeding difficulties requiring gastrostomy tube. Infantile spasms began at 3 months of age and progressed to multi-drug resistant epilepsy (absence, myoclonic, and generalized tonic-clonic seizures). Trio exome sequencing identified a

*de novo* variant in *POLR1A*, c.4685G>T; p.(Cys1562Phe). At age 3, he is non-verbal and is unable to sit independently. His height is 86.7 cm (-2.28 SD) and his head circumference is 46.1 cm (<-2 SD). He had an MRI which demonstrated peritrigonal high signal.

**Individual 17** is a 7-year-old female with craniofacial anomalies, aqueductal stenosis (requiring a shunt), multiple vertebral anomalies, and developmental delay. Craniofacial anomalies include cleft palate, bilateral preauricular tags, cleft tragus, cleft eyelids, epibulbar dermoids, right ear canal atresia, and cup-shaped ears. She also had hearing loss, primarily in the left ear with conductive loss on right due to canal atresia. She has generalized epilepsy well controlled on lamotrigine. She required a gastrostomy tube for poor feeding. Exome sequencing (GeneDx, Gaithersburg, MD) of individual 14 identified a *POLR1A* variant c.4891G>A; p.(Val1631Met) which was not maternally inherited. Paternal testing was not performed.

**Individual 18** is a 16-year-old female with mandibulofacial dysostosis (micrognathia, malar hypoplasia), congenital ptosis, congenital heart defects (atrial and ventricular septal defects, cleft mitral valve, bicuspid aortic valve, doming pulmonary valve, aortic and pulmonary artery dilation) and limb anomalies (small hands, single palmar creases, interlocked toes requiring surgery, reverse clubbed foot). She also has congenital hypotonia, requiring physical and occupational therapies. She had developmental delays and processing difficulty. Micrognathia was treated with mandibular distraction at age 7, and her photograph in Figure 1 was taken after the distraction surgery. Ascending aortic aneurysm required aortic replacement at age 13. Septal defects and mitral valve also required surgical repair. She had bilateral hip replacement at age 14 due to severe pain related to osteoarthritis and acetabular protrusion. Clinical exome sequencing (GeneDx, Gaithersburg, MD) of individual 18 identified a *POLR1A* variant c.4913C>T; p.(Pro1638Leu) which was not present in her mother. Paternal testing was not performed.

Supplemental Figures and Legends

Figure S1

A

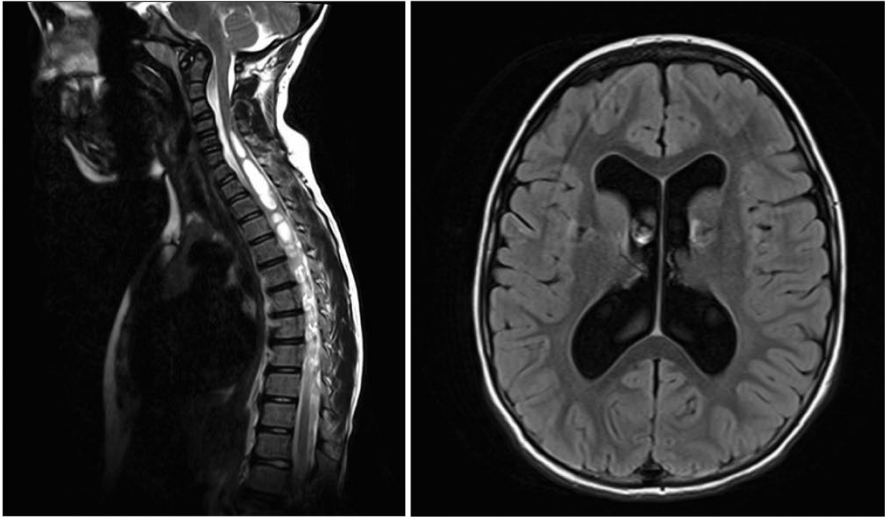

B

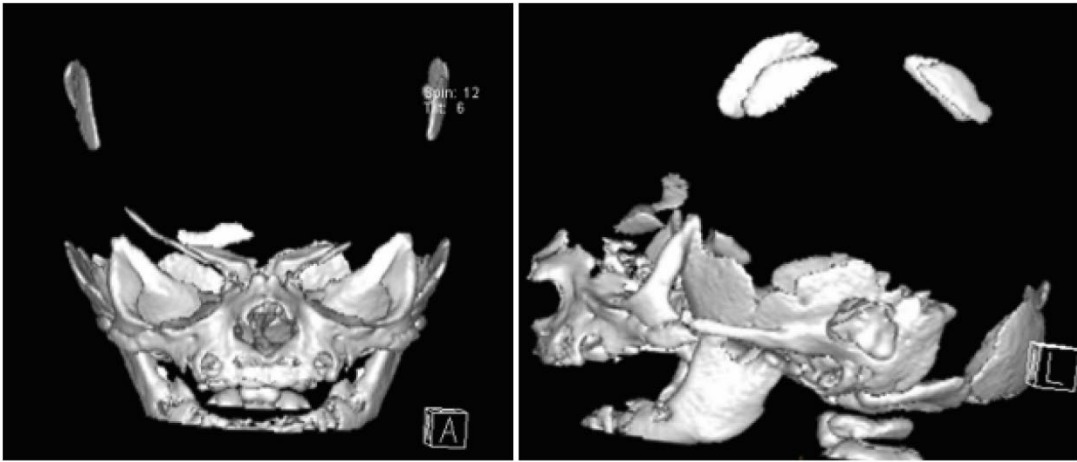

C

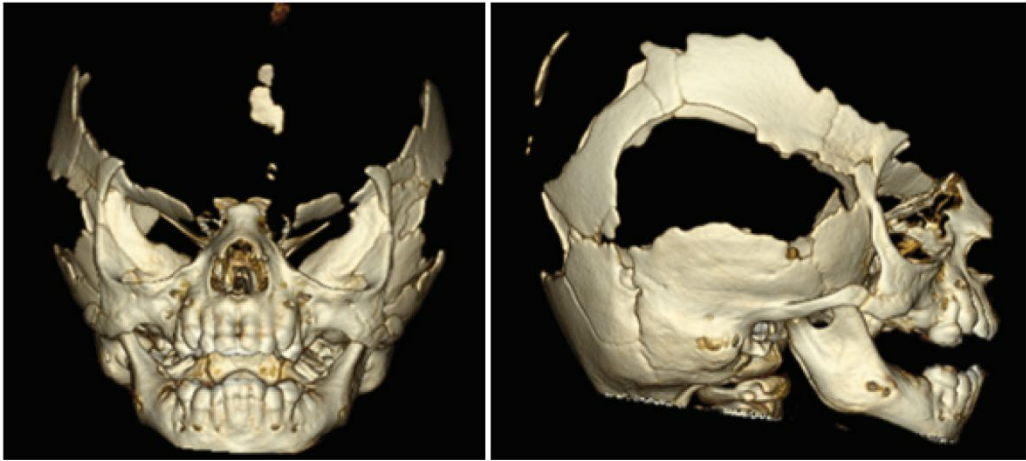

**Figure S1: Imaging findings for Individuals 6 and 8.** (A) MRI of individual 6 demonstrates extensive syringomyelia (Left) and ventriculomegaly (Right). Head CT with 3D reconstruction of Individual 8 demonstrates (B) almost complete acalvaria at 3 days of age and (C) progressive post-natal ossification evident at 26 months of age.

Figure S2

A

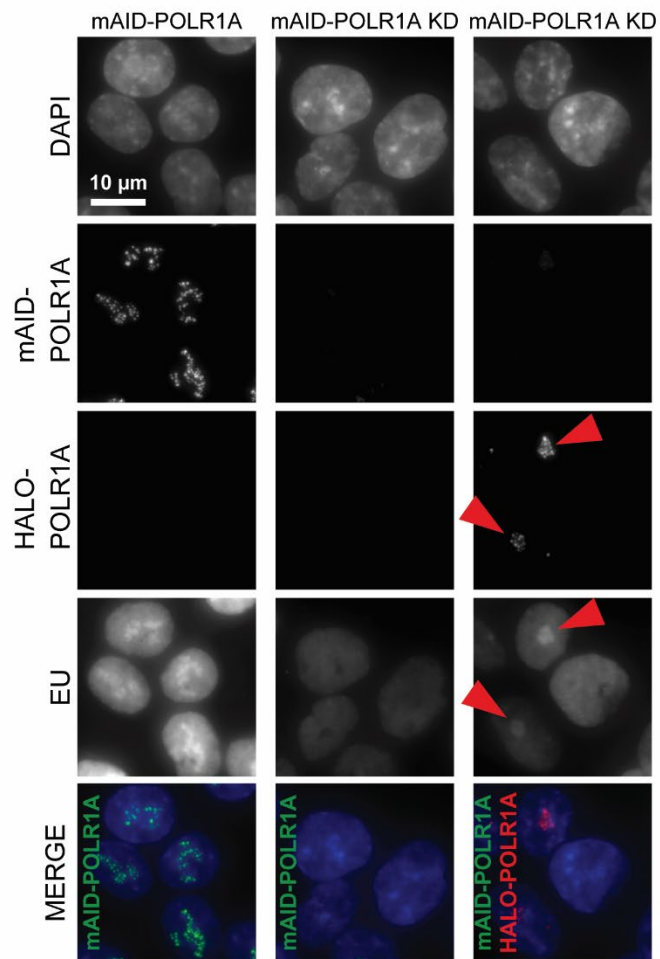

B

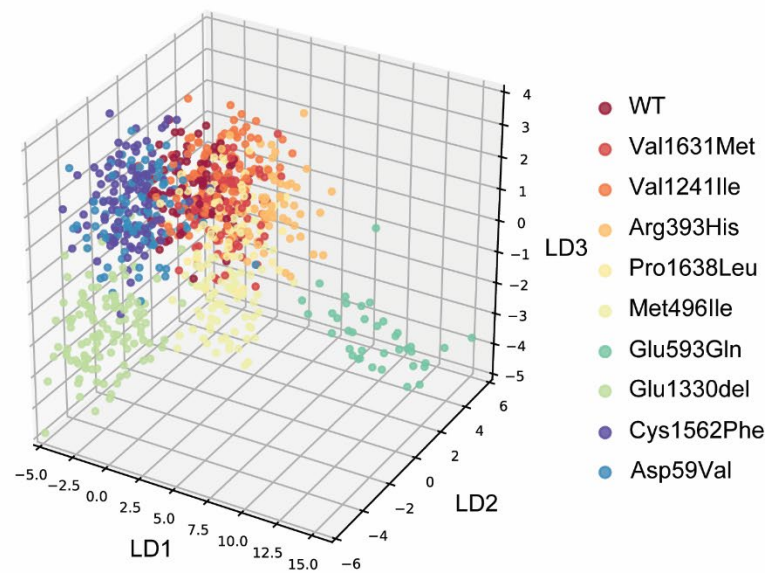

**Figure S2:** (A) Fluorescence intensity of EU in nucleoli in cells without auxin (first column), or with auxin treatment for rapid degradation of endogenous POLR1A (second column) or with the auxin treatment after transfecting the plasmid encoding wild-type POLR1A (third column). First row, DAPI staining; second row, mAID-POLR1A; third row, HaloTag-POLR1A fluorescently labeled with HaloTag ligand TMR; fourth row, EU conjugated with Alexa Fluor 594. Fifth row merged image of DAPI, mAID-POLR1A and HaloTag-POLR1A. Note that EU signals colocalized with HaloTag-POLR1A foci were quantified for evaluation of the transcription activity of HaloTag-POLR1A (arrowheads in third and fourth row). Scale bar, 10  $\mu$ m. (B) Fisher's Linear discriminant analysis (FLDA) of HaloTag-POLR1A image sets of wild type and 9 POLR1A variants (LD1: 30.5%, LD2: 23.1%, and LD3: 9.6%): 3D scatter plotting showing the discrimination of wild type and 9 POLR1A variants. Dots labeled in different colors represent the images of different groups.

Figure S3

Wild type

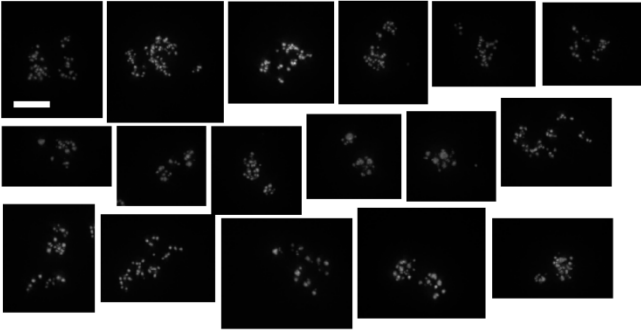

Glu1330del

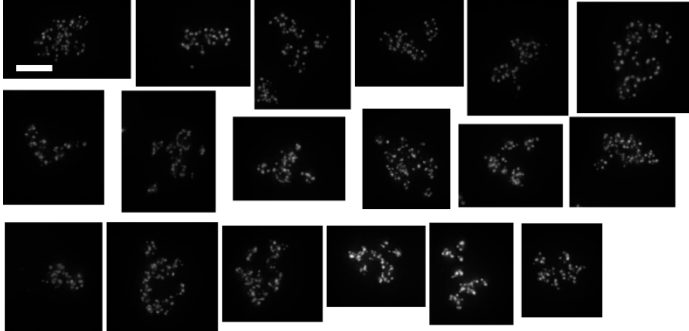

Cys1562Phe

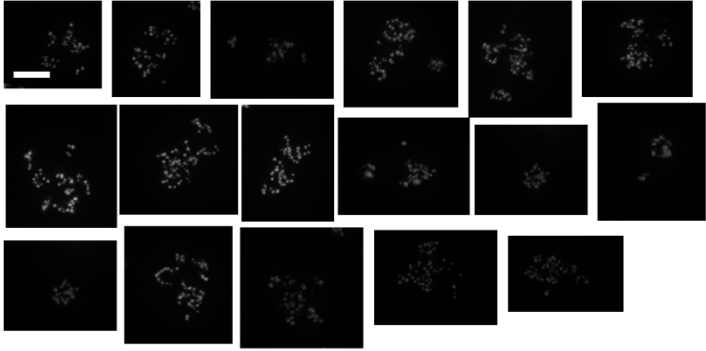

Arg393His

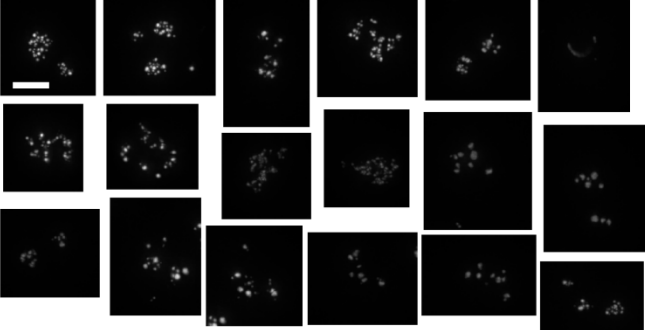

Glu593Gln

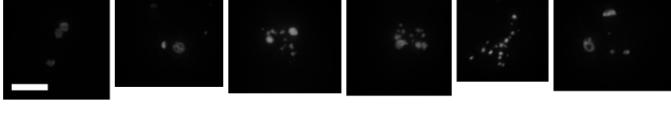



**Figure S3: POLR1A variant localization images used for machine learning analysis.** Image galleries (wild type, p.(Cys1562Phe), p.(Glu1330del), p.(Arg393His) and p.(Glu593Gln) used for wndchrm analyses described in Figure 2C. HaloTag-POLR1A was fluorescently labeled by TMR ligands. Scale bar, 5  $\mu$ m.

Figure S4

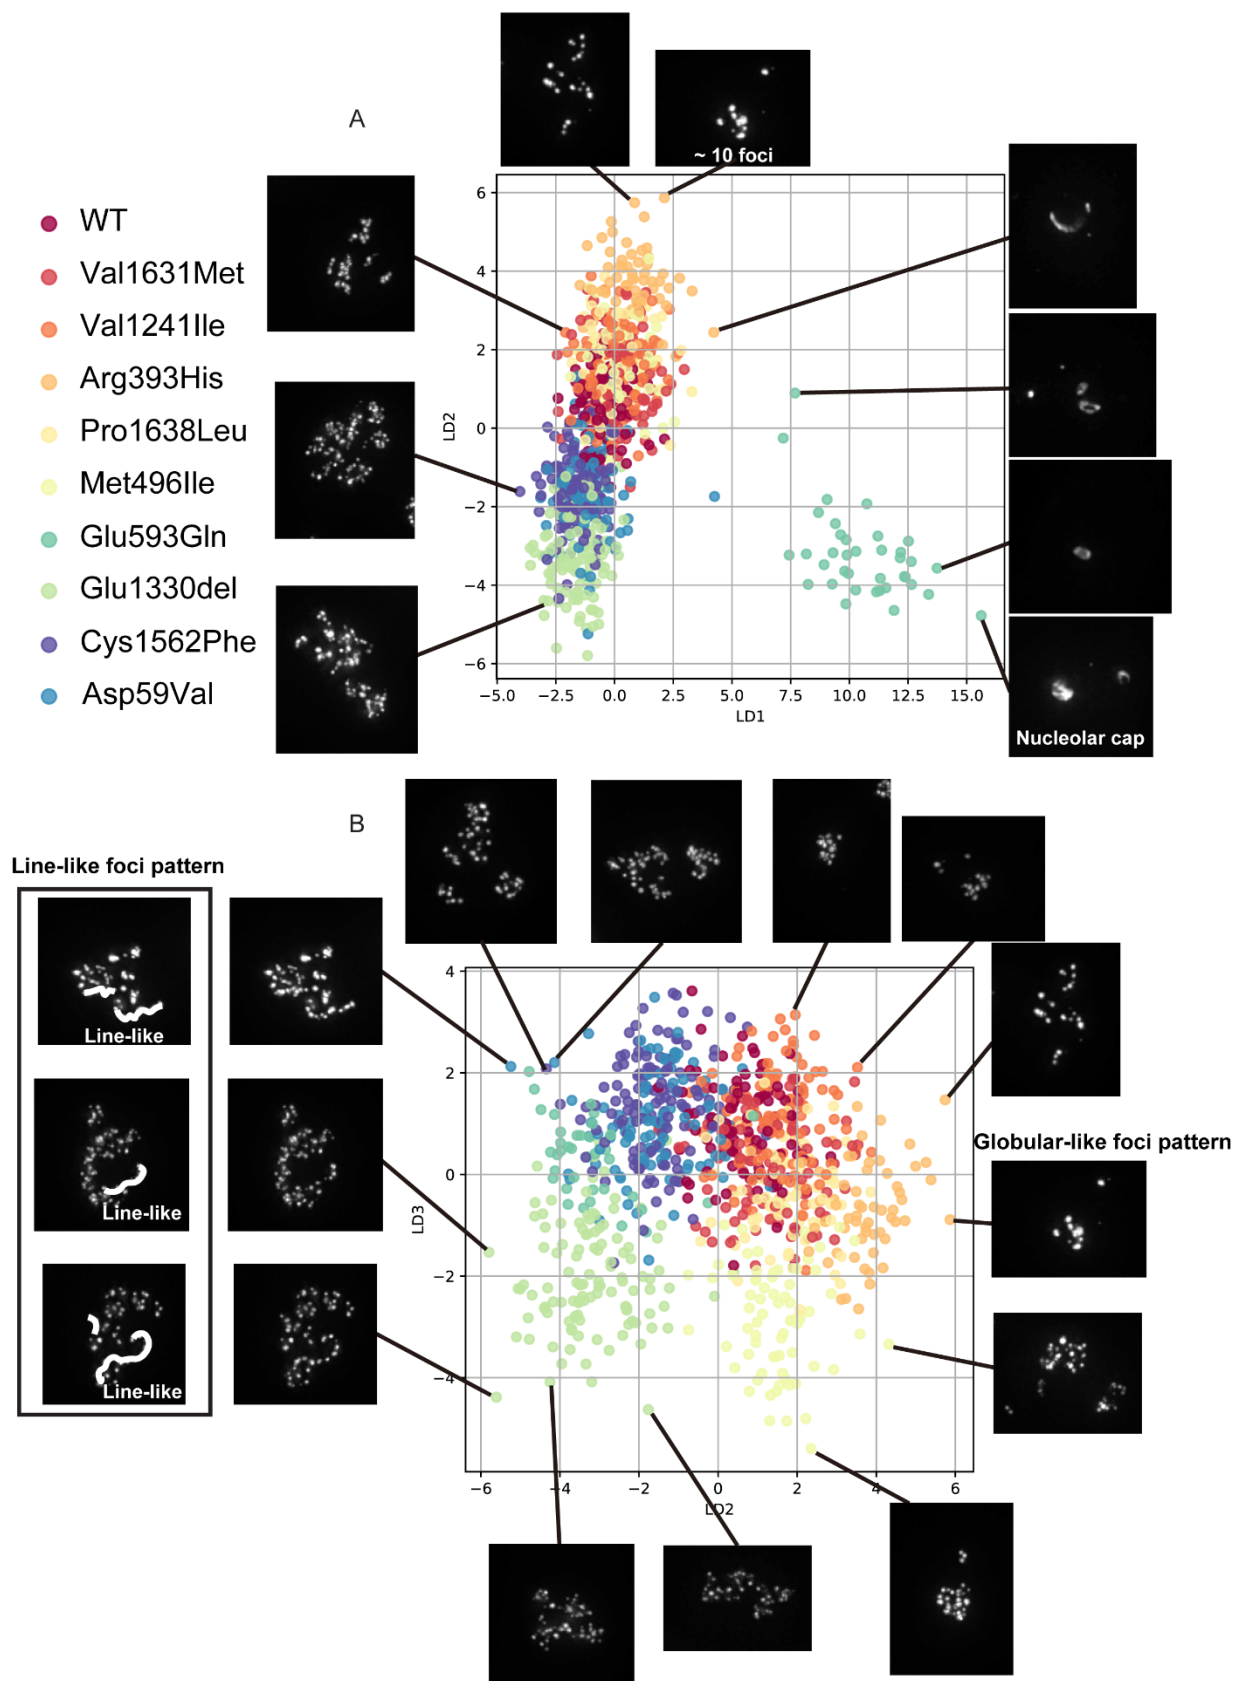

**Figure S4: 2D scatter plotting of Fisher's Linear discriminant analysis of HaloTag-POLR1A.** (A) X axis is LD1 and Y axis is LD2 of the 3D scatter plotting in Figure S2B. p.(Glu593Gln) foci are biggest and but fewest in number. p.(Arg393His) foci are smaller and more numerous than p.(Glu593Gln) foci. The foci number gradually increase in the order of p.(Arg393His), wild type, p.(Cys1562Phe) (or p.(Asp59Val) or p.(Glu1330del)), which are from top to bottom along the y-axis. (B) X axis is LD2 and Y axis is LD3. The foci clusters of p. (Glu1330del), p.(Asp59Vaol), and p.(Cys1562Phe) on the left side (with low LD2 value) are extensively stretched out and sometimes localized along a line (indicated as line-like foci pattern), while those in the right-side image (with high LD2 value) tend to gather and show globular distribution.

Figure S5

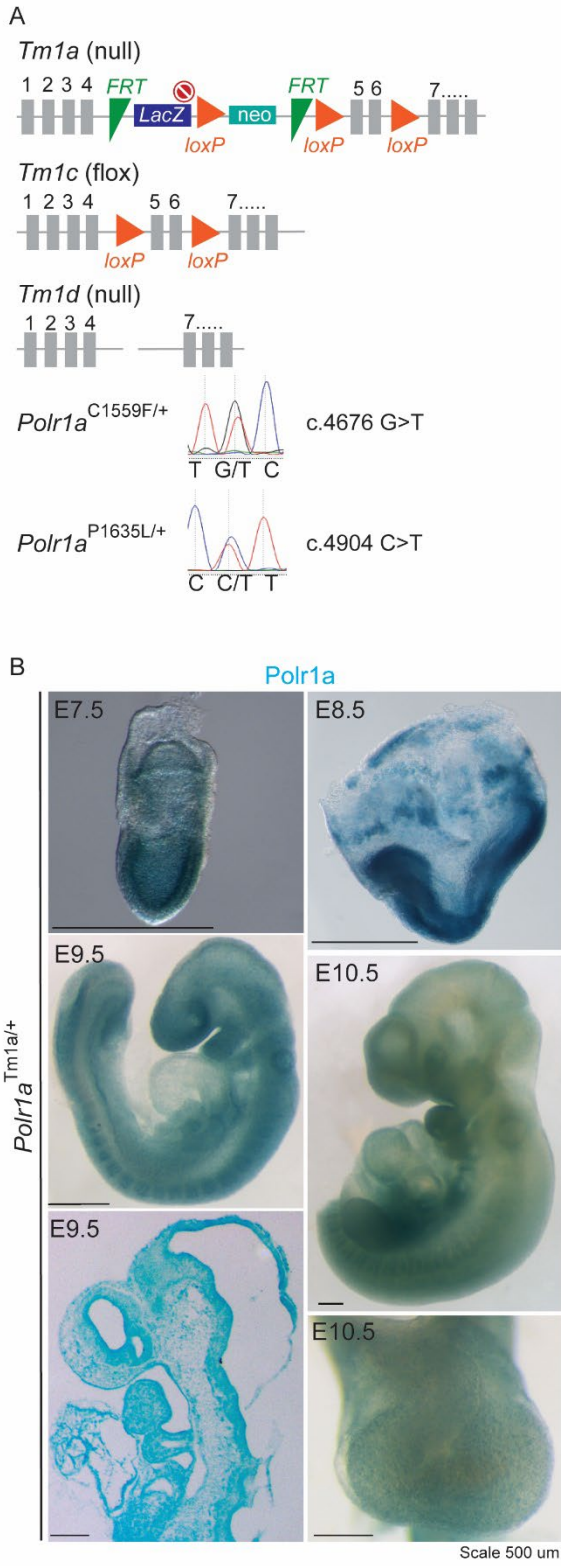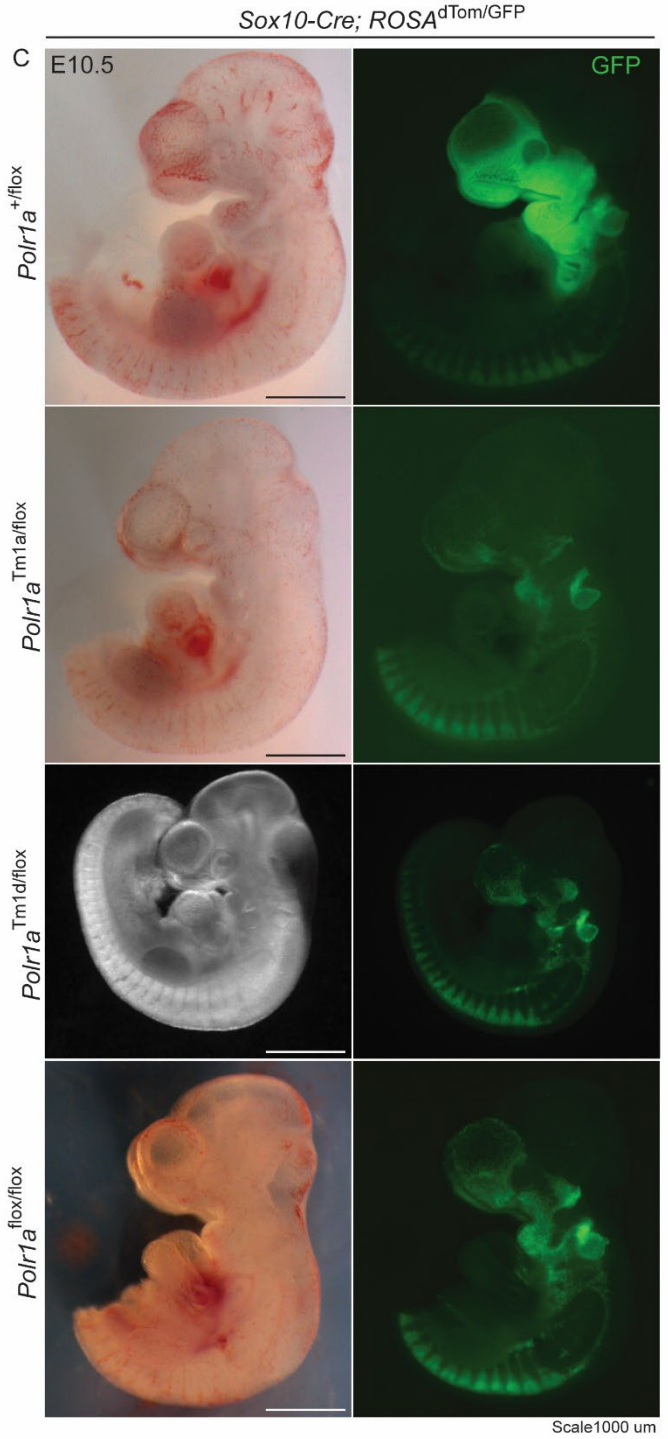

**Figure S5: Overview of *Polr1a* alleles and *Polr1a* expression.** (A) *Tm1a* and *Tm1d* are both null alleles. *Tm1a* contains a *LacZ* cassette. *Tm1c* is a flox (conditional) allele. *Polr1a*<sup>C1559F</sup> and *Polr1a*<sup>P1635L</sup> were created with CRISPR/Cas9 gene editing. (B) Expression of *Polr1a* is ubiquitous but enhanced in branchial arches, frontonasal prominence, and central nervous system at E9. At E10 differential expression in branchial arches is more pronounced. *Polr1a* is expressed in the heart at E10. Scale bar, 500  $\mu$ m. (C) *Polr1a*<sup>Tm1a/flox</sup>, *Polr1a*<sup>Tm1d/flox</sup>, and *Polr1a*<sup>flox/flox</sup> alleles produce the same phenotype when combined with Cre as exemplified here with *Sox10-Cre*. Sox10-expressing cells are labeled with GFP. Scale bar, 1000 $\mu$ m.

Figure S6

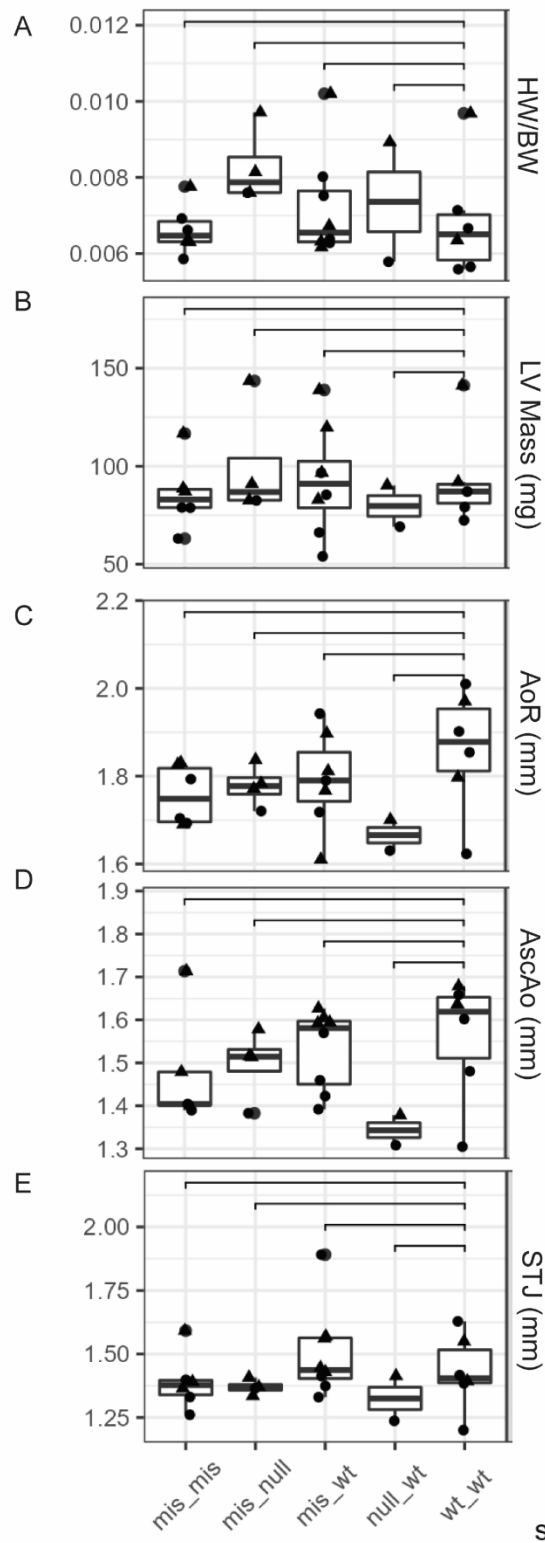

|                       |   |   |   |   |   | sex |
|-----------------------|---|---|---|---|---|-----|
| Pro1635Leu            | 1 | 4 | 3 | x | x | ● F |
| Ala1632Val_Pro1635Leu | 5 | 0 | 5 | x | x | ▲ m |
| Total                 | 6 | 4 | 8 | 2 | 6 |     |

**Figure S6: *Polr1a*<sup>P1635L</sup> and *Polr1a*<sup>A1632V\_P1635L</sup> homozygotes have normal echocardiograms.** (A) Heart weight/Body weight (HW/BW) ratios, (B) Left ventricular (LV) mass, (C) Aortic root (AoR) diameter, (D) Ascending aorta (AscAo) diameter, and (E) Sinotubular junction (STJ) diameter of mutants are not significantly different from controls. Bars indicate comparisons made using Student's t-test. P value>0.05 for all comparisons.

Figure S7

*Wnt1-Cre; ROSA<sup>dTom/GFP</sup>*

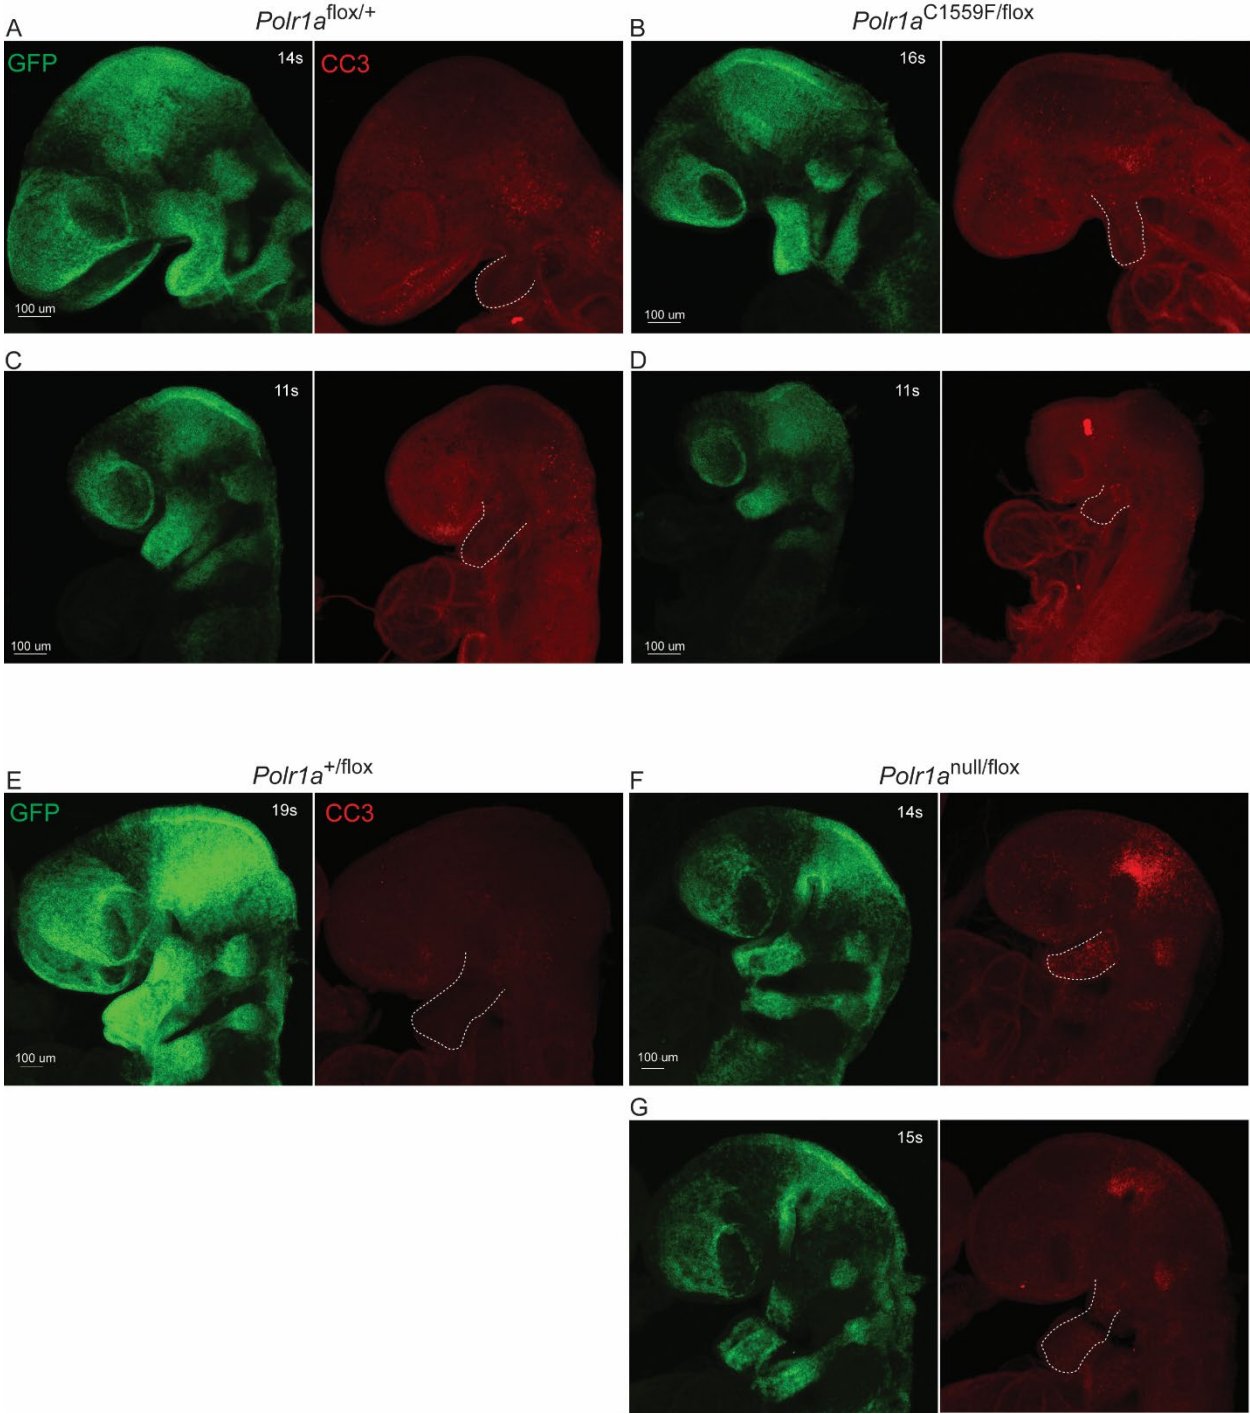



**Figure S7: CC3 localization in early *Polr1a*<sup>C1559F/flox</sup> and *Polr1a*<sup>null/flox</sup>; *Wnt1-Cre* mutants.** (A-D) At 11-16 somite stages, *Polr1a*<sup>C1559F/flox</sup>; *Wnt1-Cre* mutants do not yet have much CC3 localization apparent in their first arches (dashed white lines) and GFP-labeled NCCs are similar between controls and mutants. A and C each depict a control embryo while B and D depict matched mutant embryos. (E-G) At 14-19 somite stages, *Polr1a*<sup>null/flox</sup>; *Wnt1-Cre* mutants demonstrate robust CC3 localization in their first arches and have reduced GFP-labeled NCCs present (1 mutant each in panels F and G). Scale bar, 100um.

Figure S8

*Sox10-Cre; ROSA<sup>dTom/GFP</sup>*

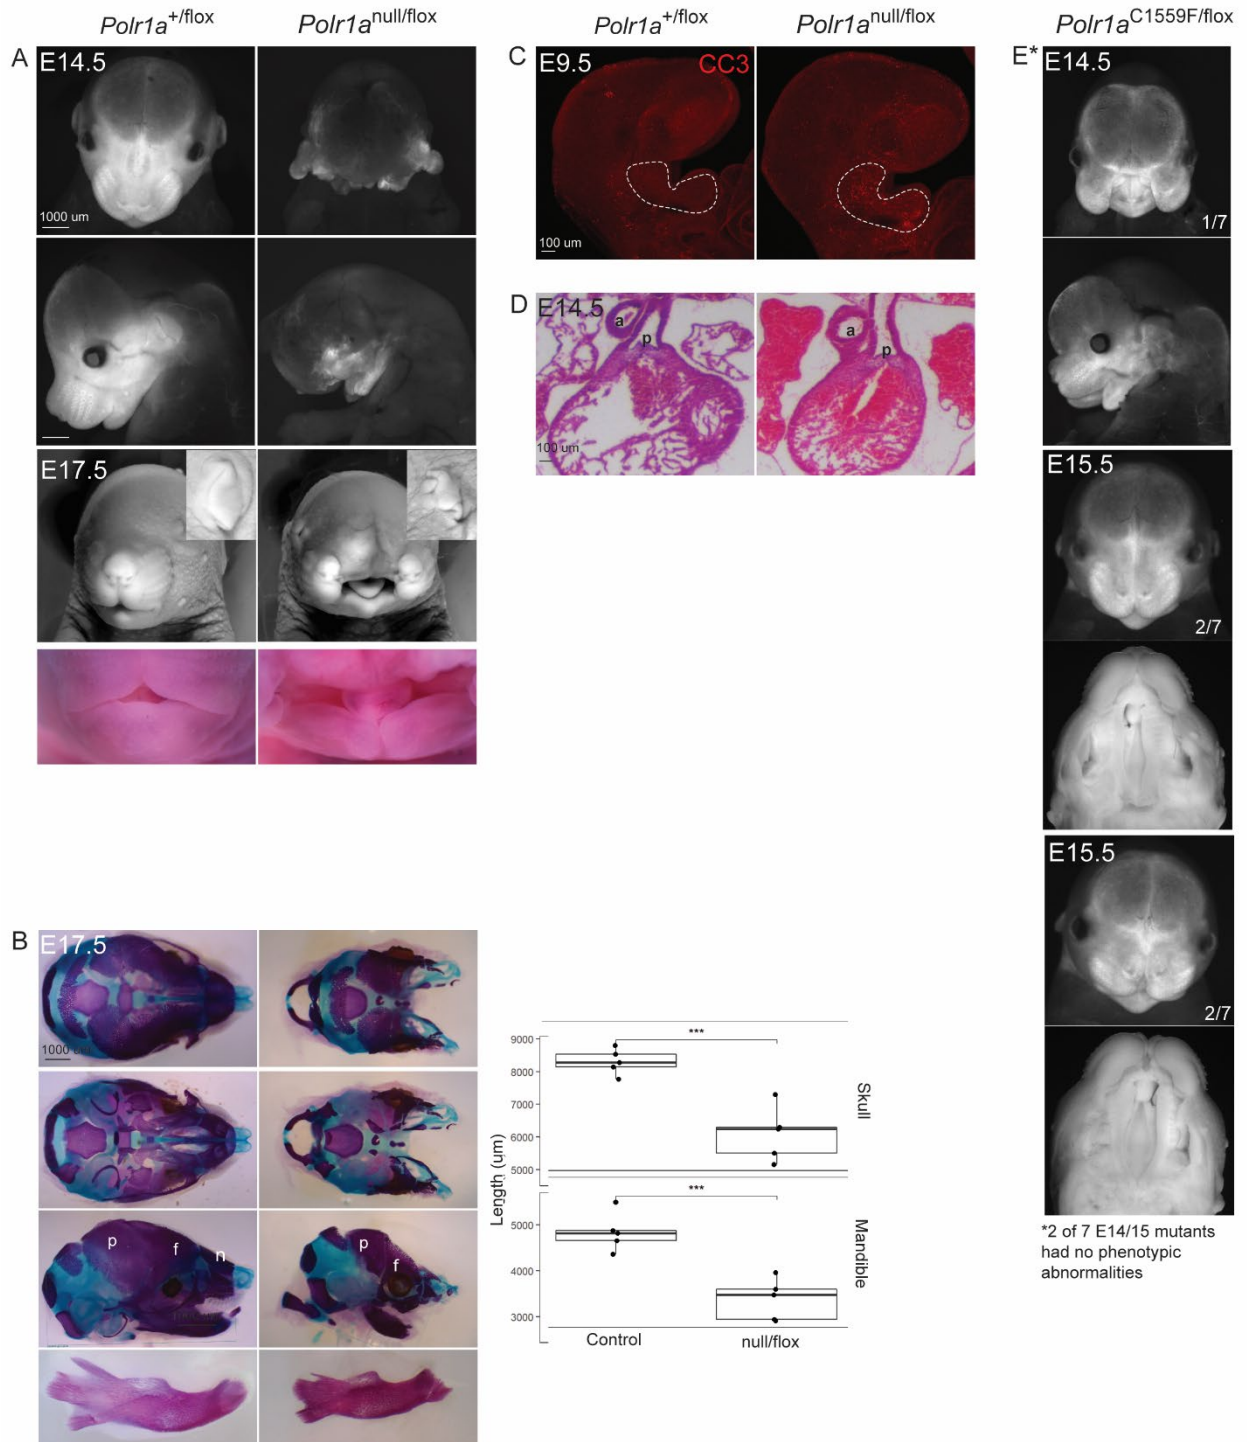

**Figure S8: Phenotype of Sox10-Cre mutants.** (A) Cleft face in *Polr1a*<sup>null/flox</sup>; *Sox10-Cre* mutants at E14 and E17 with microtia and median mandibular cleft at E17. Scale bar, 1000um. (B) Skeletal preparations of *Polr1a*<sup>null/flox</sup>; *Sox10-Cre* embryo skulls at E17 demonstrate hypoplastic skull bones, reduced skull and mandibular lengths, and wide cleft palate. “f” frontal, “p” parietal, and “n” nasal bones. Skull and mandible lengths were compared using Student’s t test. Each dot represents a separate animal (n=5 for each group). \*\*\* p value < 0.001, \* p value <0.05, “ns” not significant. Scale bar, 100um. (C) At E9.5, cell death (CC3 localization) is prominent in the first arch (dashed white line) of *Polr1a*<sup>null/flox</sup>; *Sox10-Cre* mutants. Scale bar, 100um. (D) The outflow tract of *Polr1a*<sup>null/flox</sup>; *Sox10-Cre* mutants is normally separated at E14. Scale bar, 100um. (E) Variable phenotype of *Polr1a*<sup>C1559F/flox</sup>; *Sox10-Cre* mutants at E14-E15 (n=7 total mutants analyzed).

## Supplemental References

1. Rollins, J.D., Collins, J.S., and Holden, K.R. (2010). United States head circumference growth reference charts: birth to 21 years. *J Pediatr* 156, 907-913 e902.
2. da Rocha, L.A., Pires, L.V.L., Yamamoto, G.L., Magliocco Ceroni, J.R., Honjo, R.S., de Novaes Franca Bisneto, E., Oliveira, L.A.N., Rosenberg, C., Krepischi, A.C.V., Passos-Bueno, M.R., et al. (2021). Congenital limb deficiency: Genetic investigation of 44 individuals presenting mainly longitudinal defects in isolated or syndromic forms. *Clin Genet* 100, 615-623.
3. Weaver, K.N., Watt, K.E., Hufnagel, R.B., Navajas Acedo, J., Linscott, L.L., Sund, K.L., Bender, P.L., Konig, R., Lourenco, C.M., Hehr, U., et al. (2015). Acrofacial Dysostosis, Cincinnati Type, a Mandibulofacial Dysostosis Syndrome with Limb Anomalies, Is Caused by POLR1A Dysfunction. *Am J Hum Genet* 96, 765-774.
4. Dohrn, M.F., Rebelo, A.P., Srivastava, S., Cappuccio, G., Smigiel, R., Malhotra, A., Basel, D., van de Laar, I., Neuteboom, R.F., Aarts-Tesselaar, C., et al. (2022). De Novo ATP1A1 Variants in an Early-Onset Complex Neurodevelopmental Syndrome. *Neurology* 98, 440-445.
5. Schlingmann, K.P., Bandulik, S., Mammen, C., Tarailo-Graovac, M., Holm, R., Baumann, M., Konig, J., Lee, J.J.Y., Drogemoller, B., Imminger, K., et al. (2018). Germline De Novo Mutations in ATP1A1 Cause Renal Hypomagnesemia, Refractory Seizures, and Intellectual Disability. *Am J Hum Genet* 103, 808-816.
6. Lassuthova, P., Rebelo, A.P., Ravenscroft, G., Lamont, P.J., Davis, M.R., Manganelli, F., Feely, S.M., Bacon, C., Brozkova, D.S., Haberlova, J., et al. (2018). Mutations in ATP1A1 Cause Dominant Charcot-Marie-Tooth Type 2. *Am J Hum Genet* 102, 505-514.
